# Supplementary material for: Scattered coal is the largest source of ambient volatile organic compounds during the heating season in Beijing
Source: Copernicus journal article supplement (doi:10.5194/acp-20-9351-2020), 2020-08-11
Supplement: Supplementary file 1 [file acp-20-9351-2020-supplement.zip]

Archive with 3 entries (3 files):
- acp-20-9351-2020-supplement-title-page.pdf
- final-Supplementary materials-final-revised.pdf
- final-Supplementary materials-final-revised.xlsx
