# Supplementary material for: Scattered coal is the largest source of ambient volatile organic compounds during the heating season in Beijing
Source: Copernicus journal article supplement (doi:10.5194/acp-20-9351-2020), 2020-08-11
Supplement: Supplementary file 1 [file acp-20-9351-2020-supplement.zip › acp-20-9351-2020-supplement-title-page.pdf]

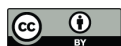

## *Supplement of*

# **Scattered coal is the largest source of ambient volatile organic compounds during the heating season in Beijing**

**Yuqi Shi et al.**

*Correspondence to:* Shaodong Xie (sdxie@pku.edu.cn)

- [acp-20-9351-2020-supplement-title-page.pdf](#)
- [final-Supplementary materials-final-revised.pdf](#)
- [final-Supplementary materials-final-revised.xlsx](#)

The copyright of individual parts of the supplement might differ from the CC BY 4.0 License.
