# Supplementary material for: Scattered coal is the largest source of ambient volatile organic compounds during the heating season in Beijing
Source: Copernicus journal article supplement (doi:10.5194/acp-20-9351-2020), 2020-08-11
Supplement: Supplementary file 1 [file acp-20-9351-2020-supplement.zip › final-Supplementary materials-final-revised.pdf]

**Text S1. Description of the online GC–MS/FID system.**

Ambient VOCs were sampled and plumed into an electronic refrigeration and pre-concentration system. To prevent particulate matter from entering the system, a Teflon filter was placed inside the sample inlet. A soda asbestos tube and water removal trap were used to remove CO<sub>2</sub> and moisture. Prior to VOC analyses, the air sample and internal calibrating gas were dried, frozen, and captured by two-way adsorption columns at -160°C. For resolving and analyses, adsorption columns were heated instantaneously to 100°C and captured compounds were transferred to a gas chromatograph. Programmed temperature increases were used to separate each VOC species. Ambient C<sub>2</sub>–C<sub>12</sub> VOC species were analyzed by dual detectors. C<sub>2</sub>–C<sub>5</sub> hydrocarbons were separated on a PLOT-Al<sub>2</sub>O<sub>3</sub> column (15 m × 0.32 mm ID × 3 µm, J&W Scientific, USA) and measured with a flame ionization detector (FID) channel, while other compounds were separated on a semi-polar column (DB-624, 60 m × 0.25 mm ID × 1.4 µm, J&W Scientific, USA) and quantified using a quadrupole mass spectrograph detector. Heating and back flushing of the adsorption columns was necessary to remove residual compounds after detection.

## **Text S2. Identification of eight VOC sources.**

The first factor was rich in ethylene, acetylene and propylene as the products of incomplete combustion of fossil fuel, such as coal (Liu et al., 2008; Borbon et al., 2003), and contributed more than 30% of ambient short-chain olefins and acetylene. The source profiles of resident coal combustion measured in China contained significant alkenes (Wang et al., 2013). As associated with coal burning stoves, benzene and toluene are adequate in profile of factor 1 (Chattopadhyay et al., 1997). Moreover, aromatics and aliphatic hydrocarbons (heptane and octane) are the most abundant compounds in solid coal (Fernandez-Martinez et al., 2000), and contributing a large part of ambient components. Therefore, the first factor was defined as coal burning. Ascending trend in morning reflects the beginning of daily livelihood like cooking.

The second factor was characterized by a significant amount of ethane, propane and iso-/n-butane, which are mainly emitted from the usage of LPG, LNG and fuel oil in China (Blake and Rowland, 1995; Ling et al., 2011; Liu et al., 2016; Lu et al., 2006). Therefore, this source likely represented emissions from residential fuel oil and gas consumption, and was identified as fuel oil and gas usage.

The ambient contribution of third factor has significant vehicle exhaust emission characteristics, and this factor excludes the part of unburned gasoline vaporization from motor vehicles (reckoned in factor 4). Factor 3 markedly contributed more than 40% of total measured ambient MTBE content. As mentioned above, MTBE is regarded as the fingerprint of gasoline vehicle tailpipe exhaust (Song et al., 2007; McCarthy et al., 2013). High contribution of various benzene derivatives, OVOCs, and heavy alkanes reveal factor 3 mainly come from gasoline and diesel vehicle exhaust (Liu et al., 2008). The diurnal variation of this source is characterized by a double wave profile with an initial increase at 07:00–11:00 and a second increase at the end of the afternoon between 16:00 and 20:00. These increases correspond to morning and evening rush-hour traffic periods.

The fourth factor is identified as a mixture of petroleum-related evaporation, including the emissions from usage, storage and transportation of petroleum production, gasoline, diesel, etc. High factor loadings of C4-C6 alkanes, such as cyclopentane, 3-methylpentane, 2-methylpentane, etc. were found (Liu et al., 2005; Liu et al., 2016; Srivastava et al., 2005; Gaimoz et al., 2011; Chang et al., 2006; Lu et al., 2006), with more than 30% of their variabilities explained by this factor. Factor 4 also includes a significant proportion of MACR (70%) and MVK (50%), the oxidation products of isoprene, in

agreement with the finding of isoprene associated with traffic activities (Borbon et al., 2001;Hellen et al., 2006). Oxygenated compounds of factor 4 were observed during the highway tunnel experiment (Baudic et al., 2016). 40% of the total measured MTBE exists in factor 4 as gasoline additive. The diurnal variation of this second factor contribution is characterized by a nighttime maximum and daytime decrease. This factor therefore represents the emissions of less reactive species, for which concentrations cannot be expected to be consumed photochemically in short transport times.

VOC-related industry represents the fifth factor. It was characterized by relatively large ambient contribution of 1-butene, trans-/cis-2-butene, 1,3-Butadiene, 1,4-Dichlorobenzene, some aromatics and OVOCs, which are tracers of industries (Ras-Mallorqui et al., 2007;Scheff and Wadden, 1993;Jiun-Horng et al., 2008). Aromatics and halocarbons are used as industrial solvents or adhesives found in car printing, furniture manufacturing and architectural coating (Cai et al., 2010); alkenes have higher ambient level in the coating industry developed areas (Chiang et al., 2007). The increasing concentration of this factor in the morning can be explained by the daily schedule of industrial manufacture.

The profile of sixth factor consists mostly of alkenes, aromatics, and halocarbons. Many proofs manifest factor 6 to be solvent utilization: many aromatic species are the major components of organic paints (Watson et al., 2001;Seila et al., 2001;Yuan et al., 2010). There were significant tracers present in the sixth factor, accounting for 20% of toluene, 20% of ethylbenzene, 35% of xylene, 50% of the acrolein, 35% of chloroethane, 40% of dichloroethane and 35% of 1,2-dichloropropane measured in this campaign, respectively. This factor contributions decreased from 09:00 and reached their minimum in 14:00 (the strongest light of the whole day). Due to the rich of high photochemical activity species (alkenes, aromatics and OVOCs), the drastic decline of this factor is mainly influenced by greater photochemical reactions under stronger midday illumination.

The seventh factor is distinguished by a significant presence of acetonitrile, an indicator of biomass burning emissions (Wang et al., 2014). About 65% of the total acetonitrile mixing ratios is apportioned to this factor. Very small quantities of other compounds add to the total factor mass. This factor was identified as biomass burning.

The profile for the last factor was characterized by abundant long lifetime species, including 60% of Freon113, 100% of Freon114 and 80% of Freon11. These chemicals have a long lifespan in the atmosphere and depend on background levels (McCarthy et al., 2007). Besides, the profile of this factor also consists of: a portion of carbonyls, the secondary formation products probably transferred from

surroundings (Mo et al., 2016). Thus, the factor 8 was identified as transmitted/long-lived species. this factor has inconspicuous diurnal variation and reaches maximum value at noon, which is the characteristic of secondary products from photochemical reaction (Li et al., 2016). These secondary products are mostly transmitted from surrounding area. Long-lived species also scarcely change with time.

**Text S3. Explanation of scattered coal application.**

Detailed explanation of different SC application sectors is shown below.

SC for residential sector: household heating and cooking in urban and rural areas; SC for rural production sector: heating for greenhouses, breeding, flue-cured tobacco and tea making in rural areas; SC for commercial and public sector: heating, cooking and steaming supplies for restaurants, hotels, baths, institutions, schools, hospitals, etc.; SC for industrial sector: small-scale boilers and furnaces of industrial field.

Temperature is a direct indicator of heating demand and is found to affect residential fuel consumption.

Fuel choice is also impacted by various socioeconomic factors including household income, energy prices, fuel access, electrification, and level of education (Peng et al., 2019).

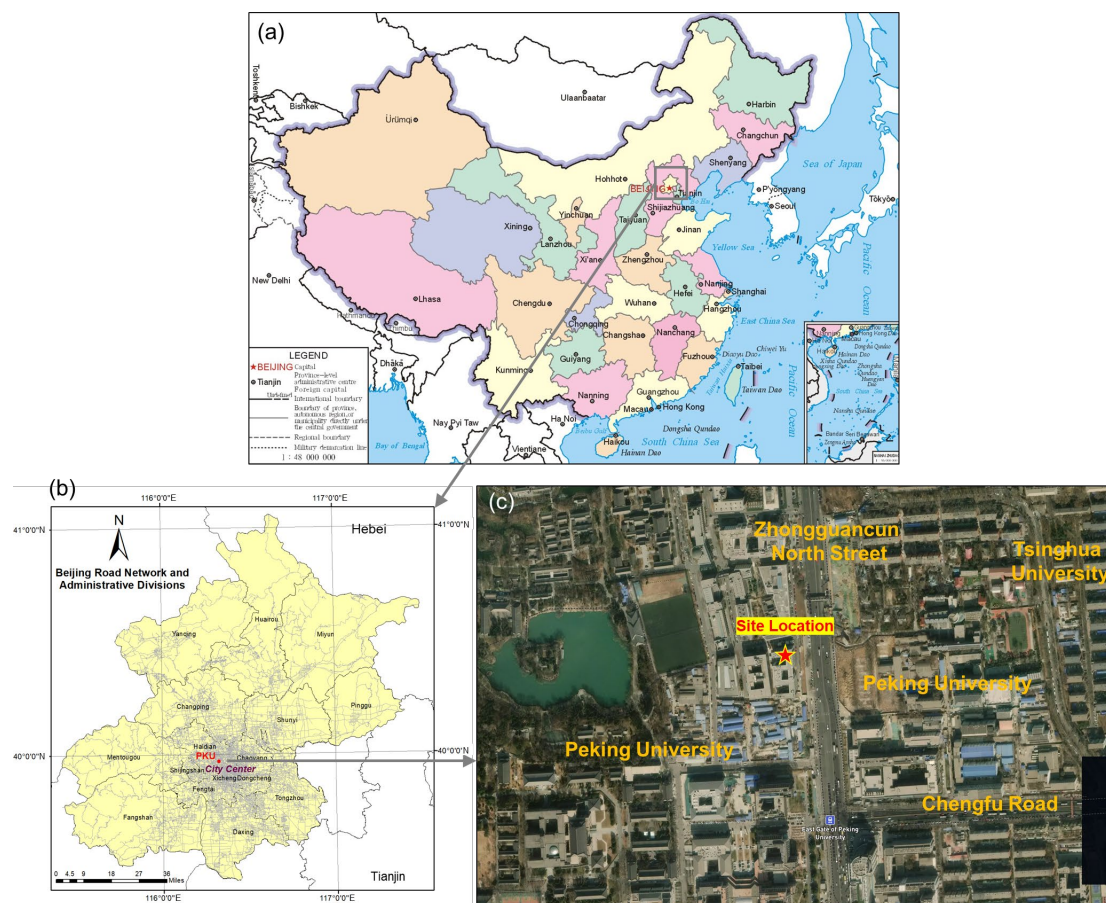

**Figure S1. The location of (a) Beijing in China (<http://bzdt.ch.mnr.gov.cn/>) and (b) Peking University (PKU) in Beijing (Datasource: © OpenStreetMap contributors 2016. Distributed under a Creative Commons BY-SA License.) (<http://openstreetmap.org/>); and (c) the surroundings of the sampling site at PKU (<https://www.mapbox.com/>).**

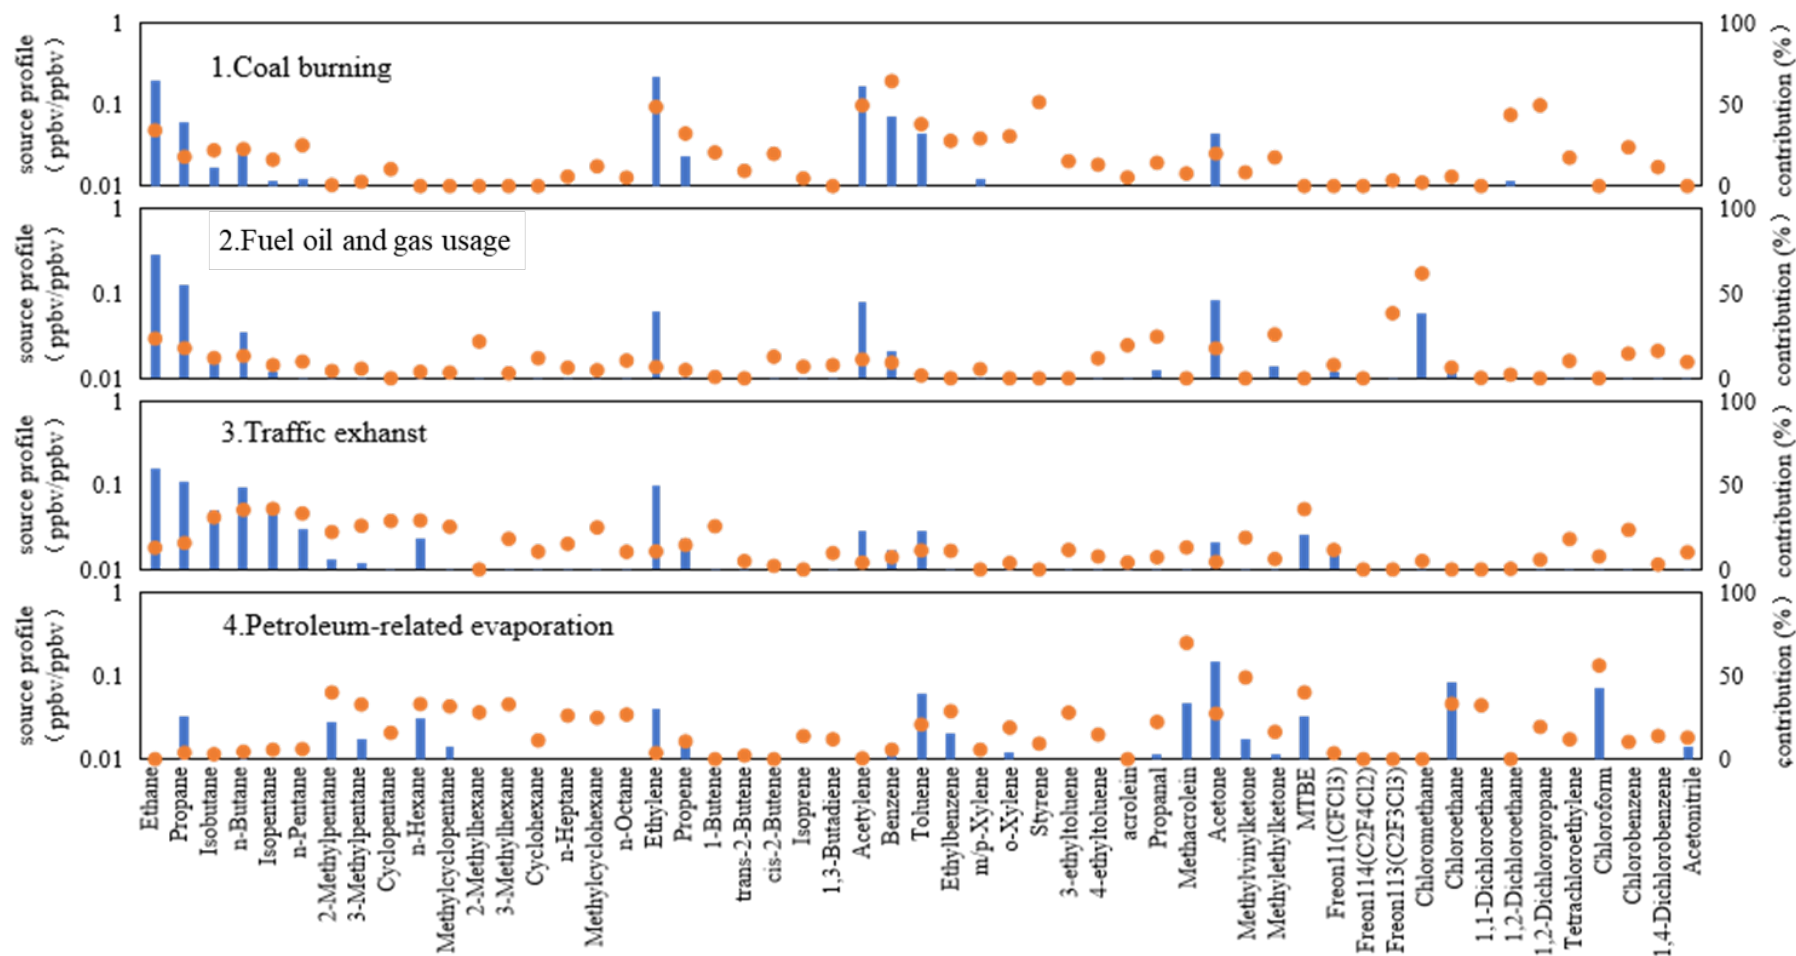

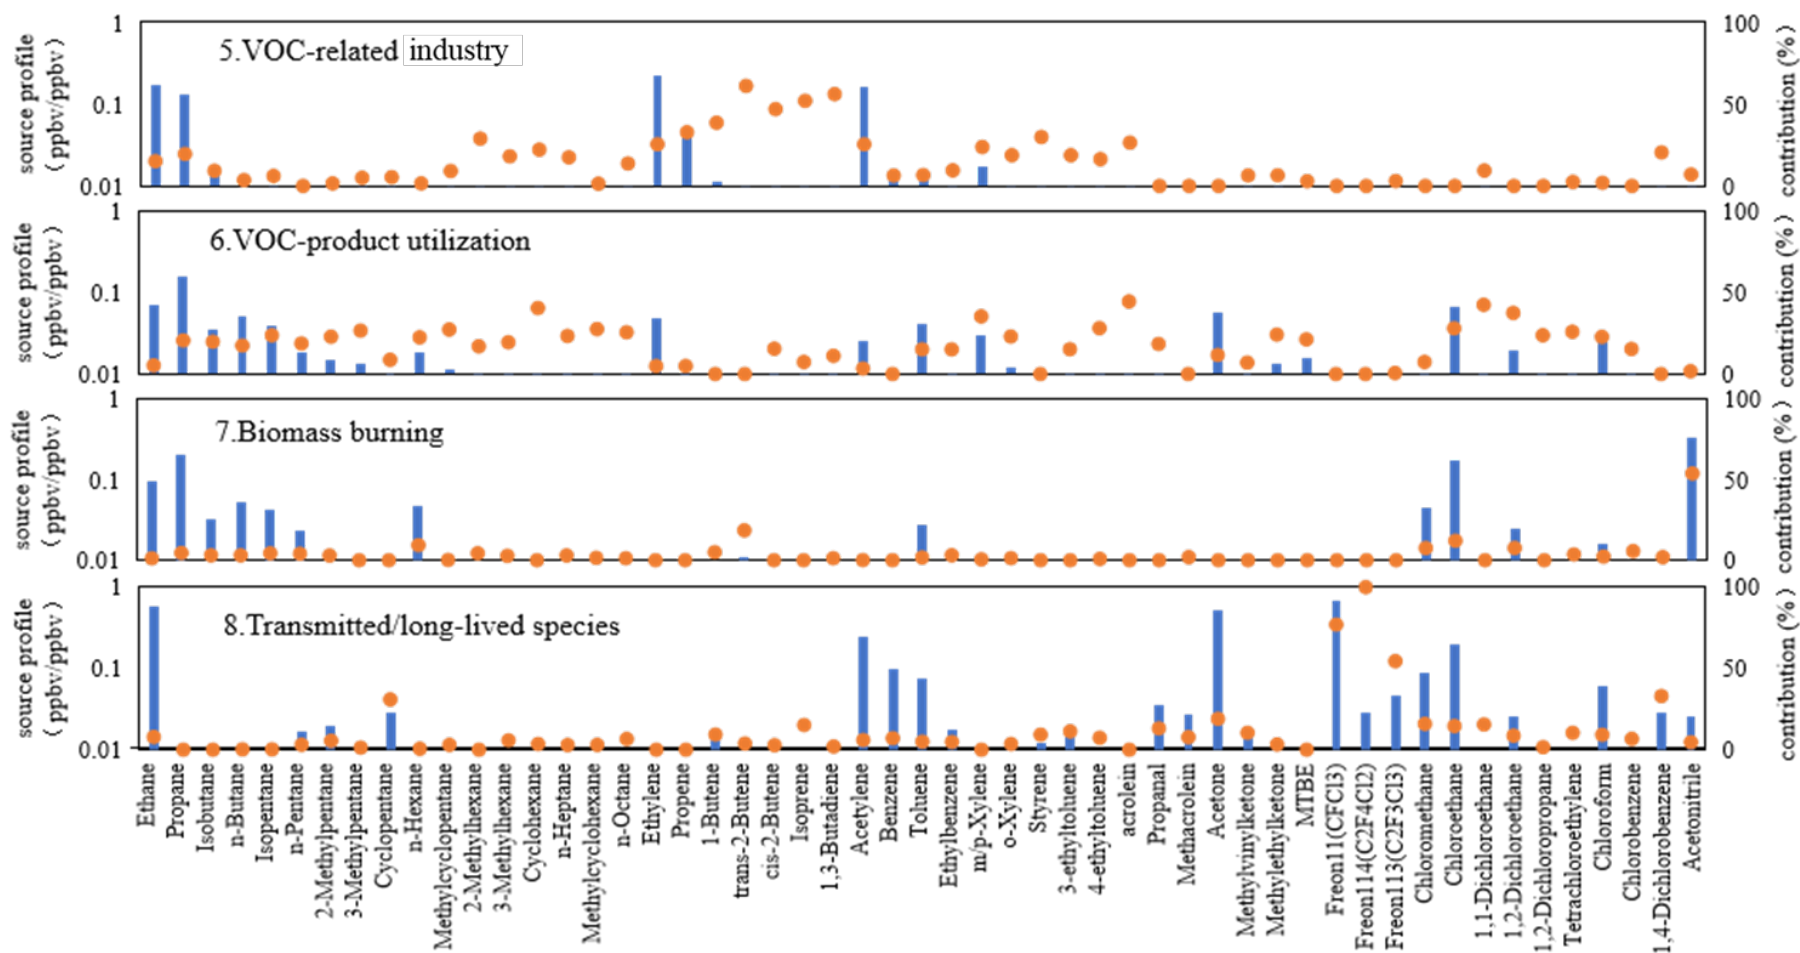

Figure S2. Modelled source profiles (ppbv ppbv<sup>-1</sup>) together with the relative contributions of individual sources to each parsed species derived from PMF result.

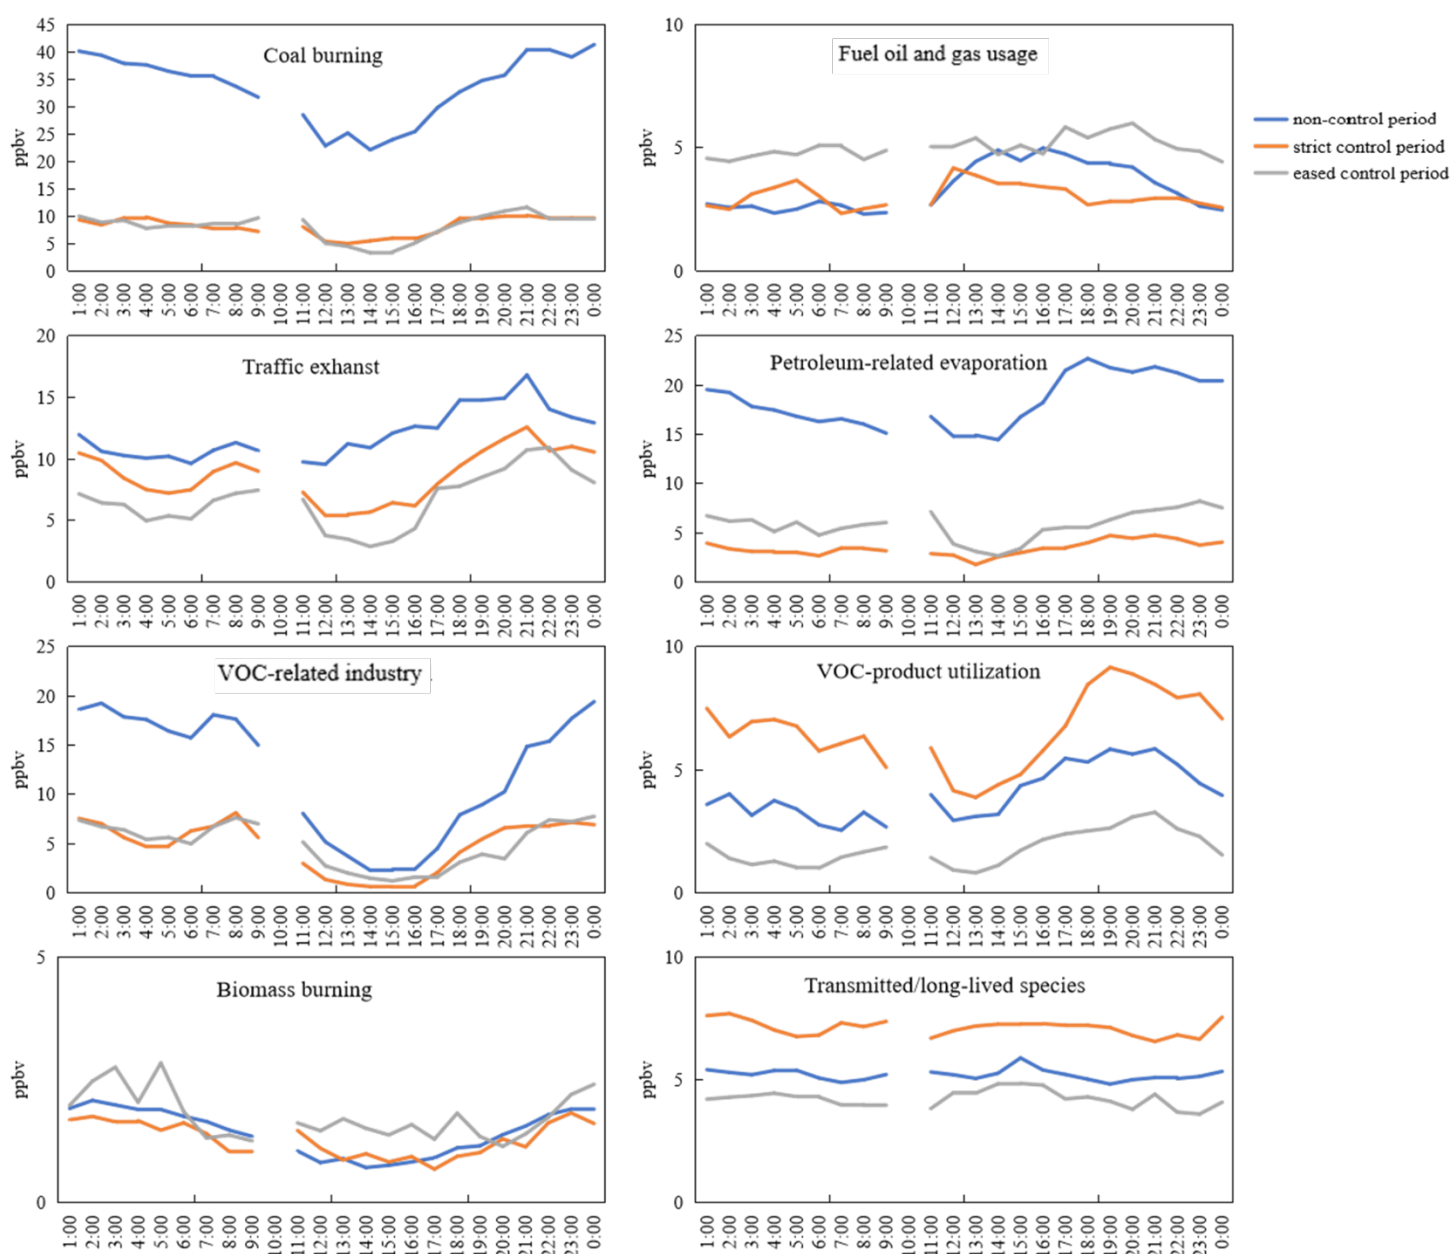

**Figure S3. Diurnal variations in mixing ratios of eight sources in Beijing during the non-control and control periods.**

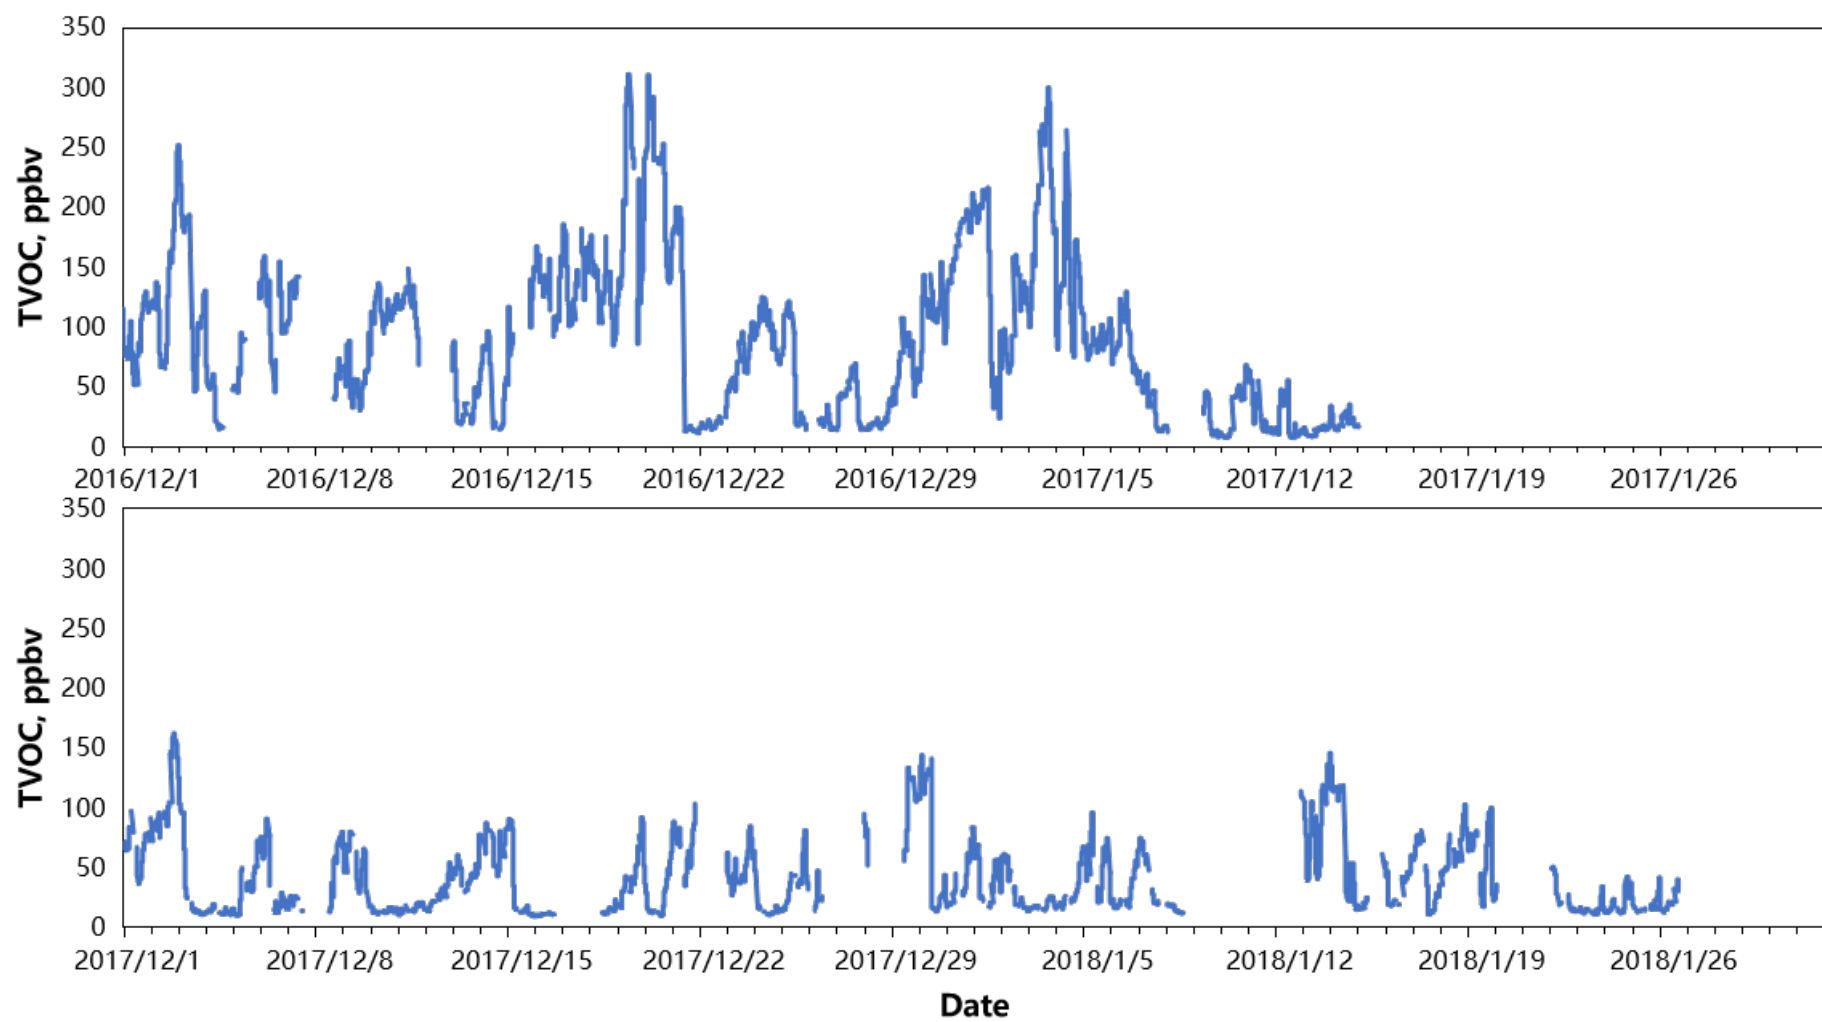

Figure S4. Full-time variations in mixing ratios of eight sources in Beijing during the non-control and control periods.

**Table S4. Summary of average meteorological parameters during the non-control and control periods.**

| Meteorological Parameters           | Non-control         | Control             |
|-------------------------------------|---------------------|---------------------|
|                                     | Dec.2016 - Jan.2017 | Dec.2017 – Jan.2018 |
| Temperature (°C)                    | -1.4                | -2.6                |
| Wind Speed (m/s)                    | 2.8                 | 3.5                 |
| Wind Speed $\leq 3$ (proportion, %) | 74                  | 62                  |
| Northerly Winds (proportion, %)     | 67                  | 63                  |
| Snowfall (days)                     | 4                   | 2                   |
| Relative Humidity (%)               | 63                  | 41                  |

<sup>a</sup> Meteorological data were all measured at a time interval of 0.5 h.

<sup>b</sup> Northerly wind includes NW, NNW, N, NNE, NE.

**Table S8. Comparison of the relative contributions of sources of VOC emissions in Beijing calculated by the PMF model in this study and results from the other studies.**

| Reference          | Sampling period        |                  | Site type | Source categories |                  |         |      |          |                     |
|--------------------|------------------------|------------------|-----------|-------------------|------------------|---------|------|----------|---------------------|
|                    | Period                 | Season           |           | Vehicle           | Industrial       | Solvent | Fuel | Biogenic | Others <sup>a</sup> |
| Li et al. (2019)   | Apr, 2015              | Spring           | Urban     | 22%               | 21%              | 7%      | 12%  | 5%       | 33%                 |
| Li et al. (2019)   | Jul, 2015              | Summer           | Urban     | 50%               | 6%               | 12%     | 4%   | 18%      | 10%                 |
| Song et al. (2007) | 1–26 Aug, 2005         | Summer           | Urban     | 55%               | 20%              | 5%      | 5%   | 2%       | 11%                 |
| Li et al. (2016)   | 11–19 Aug, 2015        | Summer           | Urban     | 57%               | 4%               | 14%     | 10%  | 1%       | 14%                 |
| Yuan et al. (2009) | 15 Aug to 10 Sep, 2006 | Summer to Autumn | Urban     | 62%               |                  | 16%     | 6%   | 3%       | 13%                 |
| Yuan et al. (2009) | 15 Aug to 10 Sep, 2006 | Summer to Autumn | Rural     | 39%               |                  | 14%     | 3%   | 8%       | 37%                 |
| Li et al. (2019)   | Oct, 2015              | Autumn           | Urban     | 33%               | 16%              | 23%     | 6%   | 5%       | 18%                 |
| Wu et al. (2016)   | 1–15 Oct, 2014         | Autumn           | Urban     | 49%               | 11%              | 9%      | 22%  |          | 9%                  |
| Li et al. (2015)   | 18–31 Oct, 2014        | Autumn           | Urban     | 43%               | 22%              | 12%     | 9%   |          | 14%                 |
| Yang et al. (2018) | 25 Oct–2 Nov, 2014     | Autumn           | suburban  | 42%               | 14%              | 22%     | 22%  |          | 0%                  |
| Li et al. (2019)   | Jan, 2015              | Winter           | Urban     | 19%               | 14%              | 3%      | 55%  | 1%       | 7%                  |
| Li et al. (2015)   | 13–22 Nov, 2014        | Winter           | Urban     | 20%               | 14%              | 11%     | 45%  |          | 10%                 |
| Yang et al. (2018) | 13 Nov–13 Dec, 2014    | Winter           | suburban  | 17%               | 25%              | 13%     | 45%  |          | 0%                  |
| This study         | Dec, 2016–Jan, 2017    | Winter           | Urban     | 33% <sup>b</sup>  | 14% <sup>b</sup> | 4%      | 37%  |          | 12%                 |
| This study         | Dec, 2017              | Winter           | Urban     | 28% <sup>b</sup>  | 11% <sup>b</sup> | 15%     | 19%  |          | 27%                 |
| This study         | Jan, 2018              | Winter           | Urban     | 32% <sup>b</sup>  | 13% <sup>b</sup> | 5%      | 21%  |          | 29%                 |

<sup>a</sup> The source categories of different PMF studies are different. Except for some comment categories (vehicle, industrial processes, solvent utilization, fuel combustion, and biogenic), there are some other categories such as aged air mass, long-lived species, biomass burning, background, secondary formation, LPG, NG, which were defined as others in Table S7.

<sup>b</sup> the source categories of the PMF results of this study is different from other studies, “vehicle” includes traffic exhaust, traffic evaporation and petrochemical evaporation; industrial does not include petrochemical evaporation.

## References

- Baudic, A., Gros, V., Sauvage, S., Locoge, N., Sanchez, O., Sarda-Esteve, R., Kalogridis, C., Petit, J. E., Bonnaire, N., Baisnee, D., Favez, O., Albinet, A., Sciare, J., and Bonsang, B.: Seasonal variability and source apportionment of volatile organic compounds (VOCs) in the Paris megacity (France), *Atmos Chem Phys*, 16, 11961-11989, 10.5194/acp-16-11961-2016, 2016.
- Blake, D. R., and Rowland, F. S.: Urban Leakage of Liquefied Petroleum Gas and Its Impact on Mexico-City Air-Quality, *Science*, 269, 953-956, 1995.
- Borbon, A., Fontaine, H., Veillerot, M., Locoge, N., Galloo, J. C., and Guillermo, R.: An investigation into the traffic-related fraction of isoprene at an urban location, *Atmos Environ*, 35, 3749-3760, 2001.
- Borbon, A., Fontaine, H., Locoge, N., Veillerot, M., and Galloo, J. C.: Developing receptor-oriented methods for non-methane hydrocarbon characterisation in urban air. Part II: source apportionment, *Atmos Environ*, 37, 4065-4076, 2003.
- Cai, C. J., Geng, F. H., Tie, X. X., Yu, Q. O., and An, J. L.: Characteristics and source apportionment of VOCs measured in Shanghai, China, *Atmos Environ*, 44, 5005-5014, 10.1016/j.atmosenv.2010.07.059, 2010.
- Chang, C. C., Wang, J. L., Liu, S. C., and Lung, S. C. C.: Assessment of vehicular and non-vehicular contributions to hydrocarbons using exclusive vehicular indicators, *Atmos Environ*, 40, 6349-6361, 10.1016/j.atmosenv.2006.05.043, 2006.
- Chattopadhyay, G., Samanta, G., Chatterjee, S., and Chakraborti, D.: Determination of benzene, toluene and xylene in ambient air of Calcutta for three years during winter, *Environ Technol*, 18, 211-218, 1997.
- Chiang, H. L., Tsai, J. H., Chen, S. Y., Lin, K. H., and Ma, S. Y.: VOC concentration profiles in an ozone non-attainment area: A case study in an urban and industrial complex metropolplex in southern Taiwan, *Atmos Environ*, 41, 1848-1860, 2007.
- Fernandez-Martinez, G., Lopez-Mahia, P., Muniategui-Lorenzo, S., and Prada-Rodriguez, D.: Determination of volatile organic compounds in coal, fly ash and slag samples by direct thermal desorption/GC/MS, *Analisis*, 28, 953-959, 2000.
- Gaimoz, C., Sauvage, S., Gros, V., Herrmann, F., Williams, J., Locoge, N., Perrussel, O., Bonsang, B., d'Argouges, O., Sarda-Esteve, R., and Sciare, J.: Volatile organic compounds sources in Paris in spring 2007. Part II: source apportionment using positive matrix factorisation, *Environ Chem*, 8, 91-103, 2011.
- Hellen, H., Hakola, H., Pirjola, L., Laurila, T., and Pystynen, K. H.: Ambient air concentrations, source profiles, and source apportionment of 71 different C2-C10 volatile organic compounds in urban and residential areas of Finland, *Environ Sci Technol*, 40, 103-108, 10.1021/es051659d, 2006.
- Jiun-Horng, T., Kuo-Hsiung, L., Chih-Yu, C., Nina, L., Sen-Yi, M., and Hung-Lung, C.: Volatile organic compound constituents from an integrated iron and steel facility, *Journal of Hazardous Materials*, 157, 569-578, 2008.
- Li, J., Xie, S. D., Zeng, L. M., Li, L. Y., Li, Y. Q., and Wu, R. R.: Characterization of ambient volatile organic compounds and their sources in Beijing, before, during, and after Asia-Pacific Economic Cooperation China 2014, *Atmos Chem Phys*, 15, 7945-7959, 10.5194/acp-15-7945-2015, 2015.
- Li, J., Wu, R. R., Li, Y. Q., Hao, Y. F., Xie, S. D., and Zeng, L. M.: Effects of rigorous emission controls on reducing ambient volatile organic compounds in Beijing, China, *Sci Total Environ*, 557, 531-541,

- 10.1016/j.scitotenv.2016.03.140, 2016.
- Li, J., Hao, Y. F., Simayi, M., Shi, Y. Q., Xi, Z. Y., and Xie, S. D.: Verification of anthropogenic VOC emission inventory through ambient measurements and satellite retrievals, *Atmos Chem Phys*, 19, 5905-5921, 10.5194/acp-2018-1133-ac1 2019.
- Ling, Z. H., Guo, H., Cheng, H. R., and Yu, Y. F.: Sources of ambient volatile organic compounds and their contributions to photochemical ozone formation at a site in the Pearl River Delta, southern China, *Environ Pollut*, 159, 2310-2319, 2011.
- Liu, B. S., Liang, D. N., Yang, J. M., Dai, Q. L., Bi, X. H., Feng, Y. C., Yuan, J., Xiao, Z. M., Zhang, Y. F., and Xu, H.: Characterization and source apportionment of volatile organic compounds based on 1-year of observational data in Tianjin, China, *Environ Pollut*, 218, 757-769, 10.1016/j.envpol.2016.07.072, 2016.
- Liu, Y., Shao, M., Zhang, J., Fu, L. L., and Lu, S. H.: Distributions and source apportionment of ambient volatile organic compounds in Beijing city, China, *J Environ Sci Heal A*, 40, 1843-1860, 10.1080/10934520500182842, 2005.
- Liu, Y., Shao, M., Fu, L. L., Lu, S. H., Zeng, L. M., and Tang, D. G.: Source profiles of volatile organic compounds (VOCs) measured in China: Part I, *Atmos Environ*, 42, 6247-6260, 10.1016/j.atmosenv.2008.01.070, 2008.
- Lu, S., Bai, Y., Zhang, G., and Li, T.: Source apportionment of anthropogenic emissions of volatile organic compounds, *Acta Scientiae Circumstantiae*, 26, 757-763, 2006.
- McCarthy, M. C., Hafner, H. R., Chinkin, L. R., and Charrier, J. G.: Temporal variability of selected air toxics in the United States, *Atmos Environ*, 41, 7180-7194, 2007.
- McCarthy, M. C., Aklilu, Y. A., Brown, S. G., and Lyder, D. A.: Source apportionment of volatile organic compounds measured in Edmonton, Alberta, *Atmos Environ*, 81, 504-516, 2013.
- Mo, Z. W., Shao, M., and Lu, S. H.: Compilation of a source profile database for hydrocarbon and OVOC emissions in China, *Atmos Environ*, 143, 209-217, 2016.
- Peng, L. Q., Zhang, Q., Yao, Z. L., Mauzerall, D. L., Kang, S. C., Du, Z. Y., Zheng, Y. X., Xue, T., and He, K. B.: Underreported coal in statistics: A survey-based solid fuel consumption and emission inventory for the rural residential sector in China, *Appl Energ*, 235, 1169-1182, 10.1016/j.apenergy.2018.11.043, 2019.
- Ras-Mallorqui, M. R., Marce-Recasens, R. M., and Borrull-Ballarin, F.: Determination of volatile organic compounds in urban and industrial air from Tarragona by thermal desorption and gas chromatography-mass spectrometry, *Talanta*, 72, 941-950, 2007.
- Scheff, P. A., and Wadden, R. A.: Receptor Modeling of Volatile Organic-Compounds .1. Emission Inventory and Validation, *Environ Sci Technol*, 27, 617-625, 1993.
- Seila, R. L., Main, H. H., Arriaga, J. L., Martinez, G., and Ramadan, A.: Atmospheric volatile organic compound measurements during the 1996 Paso del Norte Ozone Study, *Sci Total Environ*, 276, 153-169, 10.1016/S0048-9697(01)00777-X 2001.
- Song, Y., Shao, M., Liu, Y., Lu, S. H., Kuster, W., Goldan, P., and Xie, S. D.: Source apportionment of ambient volatile organic compounds in Beijing, *Environ Sci Technol*, 41, 4348-4353, 10.1021/es0625982, 2007.
- Srivastava, A., Sengupta, B., and Dutta, S. A.: Source apportionment of ambient VOCs in Delhi City, *Sci Total Environ*, 343, 207-220, 2005.
- Wang, H. L., Lou, S. R., Huang, C., Qiao, L. P., Tang, X. B., Chen, C. H., Zeng, L. M., Wang, Q., Zhou, M., Lu, S. H., and Yu, X. N.: Source Profiles of Volatile Organic Compounds from Biomass Burning

- in Yangtze River Delta, China, *Aerosol Air Qual Res*, 14, 818-828, 10.4209/aaqr.2013.05.0174, 2014.
- Wang, Q., Geng, C. M., Lu, S. H., Chen, W. T., and Shao, M.: Emission factors of gaseous carbonaceous species from residential combustion of coal and crop residue briquettes, *Front Env Sci Eng*, 7, 66-76, 2013.
- Watson, J. G., Chow, J. C., and Fujita, E. M.: Review of volatile organic compound source apportionment by chemical mass balance, *Atmos Environ*, 35, 1567-1584, 2001.
- Wu, R. R., Li, J., Hao, Y. F., Li, Y. Q., Zeng, L. M., and Xie, S. D.: Evolution process and sources of ambient volatile organic compounds during a severe haze event in Beijing, China, *Sci Total Environ*, 560, 62-72, 10.1016/j.scitotenv.2016.04.030 2016.
- Yang, W., Zhang, Y., Wang, X., Li, S., Zhu, M., Yu, Q., Li, G., Huang, Z., Zhang, H., Wu, Z., Song, W., Tan, J., and Shao, M.: Volatile organic compounds at a rural site in Beijing: influence of temporary emission control and wintertime heating, *Atmos. Chem. Phys.*, 18, 12663-12682, 10.5194/acp-18-12663-2018, 2018.
- Yuan, B., Shao, M., Lu, S. H., and Wang, B.: Source profiles of volatile organic compounds associated with solvent use in Beijing, China, *Atmos Environ*, 44, 1919-1926, 10.1016/j.atmosenv.2010.02.014, 2010.
- Yuan, Z., Lau, A. K. H., Shao, M., Louie, P. K. K., Liu, S. C., and Zhu, T.: Source analysis of volatile organic compounds by positive matrix factorization in urban and rural environments in Beijing, 114, 10.1029/2008jd011190, 2009.
