# Supplementary material for: Scattered coal is the largest source of ambient volatile organic compounds during the heating season in Beijing
Source: Copernicus journal article supplement (doi:10.5194/acp-20-9351-2020), 2020-08-11
Supplement: Supplementary file 1 [file acp-20-9351-2020-supplement.zip › final-Supplementary materials-final-revised.xlsx]

## Sheet: Table S1
Table S1. Source classification and EFs of anthropogenic VOC sources.
Level 1	Level 2	Level 3	Level 4	EF	Unit	Reference
Coal burning	Scattered coal	Civil scatered coal	Rural residential stctor	8.97	g/kg	EES
			Urban residential sector	8.97	g/kg	EES
			Rural production sector	8.97	g/kg	EES
			Commercial and Public sector	8.97	g/kg	EES
		Industrial scattered coal	Industrial sector	4.54	g/kg	AP42
	Centralized coal	Manufacturing		0.39	g/kg	PKU
		Power generation		0.15	g/kg	GZRIEP
		Heat supply		0.18	g/kg	GZRIEP
Fuel oil and gas usage	LPG / LNG / NG / FO	Manufacturing	Liquefied petroleum gas	0.19	g/kg	AP42
			Liquefied natural gas	0.123	g/kg	AP42
			Natural gas	0.088	g/m3	AP42
			Fuel oil	0.04	g/kg	AP42
		Commercial and Public Services	Liquefied petroleum gas	0.19	g/kg	AP42
			Liquefied natural gas	0.123	g/kg	AP42
			Natural gas	0.088	g/m3	AP42
			Fuel oil	0.15	g/kg	AP42
		Power generation	Liquefied petroleum gas	0.19	g/kg	AP42
			Liquefied natural gas	0.123	g/kg	AP42
			Natural gas	0.088	g/m3	AP42
			Fuel oil	0.1	g/kg	AP42
		Heat supply	Liquefied petroleum gas	0.19	g/kg	AP42
			Liquefied natural gas	0.123	g/kg	AP42
			Natural gas	0.088	g/m3	AP42
			Fuel oil	0.1	g/kg	AP42
		Resident consumption	Liquefied petroleum gas	6.51	g/kg	Stella et al.,2003
			Liquefied natural gas	0.15	g/kg	Wei et al., 2008
			Natural gas	0.2	g/m3	Wei et al., 2008
		Natural gas leakage	Natural gas	21	g/m3	mass balance
		Natural gas production	Natural gas	0.34	g/m3	MEE
Traffic exhanst	On-road vehicle exhaust	Passenger cars		——	——	COPERT
		Light duty vehicles		——	——	COPERT
		Heavy duty trucks		——	——	COPERT
		Buses		——	——	COPERT
		Motorcycles		——	——	COPERT
	Off-road machinery exhaust	Aircrafts		1.95	kg/LTO	IPCC
		Marine vessels		6.2	g/kg	Wu et al., 2016
		Trains		6.14	g/kg	Wu et al., 2016
		Agricultural machinery	Gasoline	91.5	g/kg	EEA
			Diesel	18.3	g/kg	EEA
		Construction machinery	Gasoline	91.5	g/kg	EEA
			Diesel	18.3	g/kg	EEA
Traffic evaporation	Traffic evaporation			——	——	COPERT
Petroleum-related evaporation	Petroleum	Petroleum fractionation		1.8	g/kg	AP42
		Petroleum products transport	Crude oil	1.6036	g/kg	Bo et al., 2008
			Gasoline	1.6036	g/kg	Bo et al., 2008
			Diesel	1.6036	g/kg	Bo et al., 2008
			Others	1.6036	g/kg	Bo et al., 2008
		Petroleum products storage	Crude oil	0.123	g/kg	Bo et al., 2008
			Gasoline	0.156	g/kg	Bo et al., 2008
			Diesel	0.1	g/kg	GB11085-89
			Others	0.1	g/kg	GB11085-89
		Gas station	Gasoline	3.069	g/kg	Wei et al., 2008
			Diesel	0.8	g/kg	Wei et al., 2008
VOC-related industry	Raw chemicals manufacturing	Raw chemicals	Ethylene	0.6	g/kg	EEA
			Propylene	0.45	g/kg	EEA
			Benzene	0.55	g/kg	Taiwan,2009
			Ethylbenzene	0.1	g/kg	EEA
			Butadiene	5.03	g/kg	AP42
			Styrene	1	g/kg	EEA
	Synthetic product manufacturing	Fertilizer manufacturing	Synthesis ammonia	4.72	g/kg	MEE
			Urea	0.01	g/kg	MEE
		Synthetic resin materials manufacturing	PVC	0.74	g/kg	MEE
			PP	3	g/kg	MEE
			PS	5.4	g/kg	MEE
			PE	10	g/kg	MEE
		Synthetic fiber manufacturing	Cellulosic fiber	112	g/kg	AP42
			Viscose	14.5	g/kg	MEE
			Acrylonitrile	1	g/kg	EEA
			Nylon	3.3	g/kg	AP42
			Dacron	0.7	g/kg	AP42
			Acrylon	37.1	g/kg	AP42
			Vinylon	7.7	g/kg	AP42
			Polypropylene fiber	37.1	g/kg	MEE
			Synthetic fiber	73.4	g/kg	AP42
		Synthetic rubber manufacturing	Synthetic rubber	7.17	g/kg	AP42
		Pharmaceuticals production		430	g/kg	Wu et al., 2016
	Paint & related manufacturing	Paint		15	g/kg	AP42
		Ink		60	g/kg	AP42
		Carbon black		52	g/kg	AP42
	Food manufacturing	Food	Vegetable oil extraction process	9	g/kg	AP42
			Sugar	10	g/kg	EEA
			Wine	22.5	g/L	MEE
			Beer	0.35	g/L	EEA
			Red wine	0.8	g/L	EEA
	Non-metal product manufacturing	Non-metal product	Cement manufacturing	0.088	g/kg	AP42
			Flat glass	220	g/weight box	MEE
			Fiberglass	3.15	g/kg	MEE
			Ceramics manufacturing	29.22	g/kg	MEE
			Asphalt	0.43	g/kg	MEE
			Charcoal	135	g/kg	AP42
	Iron and Steel Production	Iron and Steel	Steel rolling (cold rolling/hot rolling)	0.007	g/kg	EEA
	Other manufacturing	Dyeing cloth		81.4	g/kg	AP42
		Rubber products manufacturing	Tire	0.91	kg/piece	MEE
		Polyfoam manufacturing	Polyfoamg	770	g/kg	MEE
		Artificial leather manufacturing	PVC	0.18	g/kg	MEE
		plastic molding		0.5	g/kg	GB31572-2015
		Coke production		3.065	g/kg	Li et al., 2019
		Pulp manufacturing		3.1	g/kg	MEE
		Coal washing		0.196	g/kg	AP42
		Artificial panels pulp manufacturing		3	g/m3	AP42
	Waste disposal	Municipal services	Sewage treatment	0.0011	g/kg	EEA
			Municipal waste incineration	0.74	g/kg	MEE
			Hazardous waste incineration	7.4	g/kg	EEA
			Solid waste compostion	0.02	g/kg	MEE
			Solid waste landfill	0.23	g/kg	MEE
	Surface coating	Building painting		150	g/kg	GB18582-2008
		Furniture coating		0.4	kg/piece	AP42
		Traffic equipment coating	Car	4	kg/piece	DB11/1227-2015
			Truck	10	kg/piece	DB11/1227-2015
			Buses	60	kg/piece	DB11/1227-2015
			Motorcycles	1	kg/piece	AP42
			Bicycles	0.3	kg/piece	AP42
			Ship	8.5	kg/DWT	AP42
			container	67	kg/TEU	AP42
		Machinery coating	Electrical instrument	0.4	kg/piece	AP42
			Air pollutant control equipment	0.4	kg/piece	AP42
			Packaging equipment	0.4	kg/piece	AP42
			Metal smelting equipment	0.4	kg/piece	AP42
			Metal-cutting machine tool	0.4	kg/piece	AP42
		Electronics coating	Circuit board	0.1	kg/m2	Qiu et al., 2014
			Mobile phone	0.01	kg/piece	Taiwan, 2009
			Color television receiver	0.2	kg/piece	AP42
			Microcomputer	0.2	kg/piece	AP42
			Air conditioner	0.2	kg/piece	AP42
		Vehicle repair		0.84	kg/piece/year	EEA
	Bituminous Pavement Road			26	g/kg	AP42
VOC-product utilization	Residents living consumption	Cooking	Catering services	0.18	kg/capita/year	DB11/1488-2018
			Home cooking	0.0035	kg/capita/year	AP42
		Commercial / Consumer Solvent Use	Aerosol products	0.4	kg/capita/year	AP42*
			Household products	0.215	kg/capita/year	AP42*
			Makeup	0.16	kg/capita/year	AP42*
			Nonindustrial adhesives	0.0325	kg/capita/year	AP42*
			Space deodorant	0.0225	kg/capita/year	AP42*
			Insect repellents	0.0175	kg/capita/year	AP42*
			Laundry detergent and dry cleaning	0.205	kg/capita/year	AP42*
	Other products utilization	Printing	Offset printing ink (thermosetting wheel/cold setting wheel)	100	g/kg	DB11/1201-2015
			Flexo printing ink (solvent-based/water-based)	30	g/kg	DB11/1201-2015
			Gravure printing ink (solvent-based/water-based)	300	g/kg	DB11/1201-2015
			Letterpress printing ink	300	g/kg	DB11/1201-2015
		Pesticide utilization		465	g/kg	AP42
Biomass burning	Field burning	Crop residue	Wheat	7.5	g/kg	Li et al., 2007
			Rice	6.05	g/kg	Zhang et al., 2013
			Maize	10	g/kg	Li et al., 2007
			Others	15.7	g/kg	Streets et al.,2003
	Biofuel	Crop residue		10.56	g/kg	Fu et al., 2013
		Firewood		3.13	g/kg	Wei et al., 2008
		Biogas		0.18	g/m3	AP42
PKU: Analysis of the causes and sources of air pollution in Beijing, Specialized by the Ministry of Science and Technology, 2001.
Li, X.G., Wang, S.X., Duan, L., Hao, J., Li, C., Chen, Y.S., Yang, L., 2007. Particulate and trace gas emissions from open burning of wheat straw and corn stover in China. Environ. Sci. Technol. 41, 6052-6058.
Zhang, Y., Shao, M., Lin, Y., Luan, S., Mao, N., Chen, W., Wang, M., 2013. Emission inventory of carbonaceous pollutants from biomass burning in the Pearl River Delta Region, China, Atmos. Environ., 76, 189-199.
Streets D G, Yarber K F, Woo J H, et al., 2003. Carmichael.Biomass burning in Asia: annual and seasonal estimates and atmospheric emissions. Submitted to Global Biogeochemical Cycles Revised Manuscript.
Fu, X., Wang, S., Zhao, B., Xing, J., Cheng, Z., Liu, H., Hao, J., 2013. Emission inventory of primary pollutants and chemical speciation in 2010 for the Yangtze River Delta region, China. Atmos. Environ. 70, 39-50.
EES: Research Center for Eco-Environmental Sciences, Chinese Academy of Sciences.
AP42: U.S. Environmental Protection Agency (USEPA): Compilation of air pollutant emission factors, Fifth Edition, Chapter 1–13, 1995.
AP42*:Take into consideration of the actual situation of Beijing base on AP42.
Yao, W.X, Shen, D.X, et al., 1984. Discussion on the feasibility of bituminous coal as civil fuel. Environmental Science(4), 85-89.
Wei, W., Wang, S.X., Chatani, S., Klimont, Z., Cofala, J., Hao, J.M., 2008. Emission and speciation of non-methane volatile organic compounds from anthropogenic sources in China. Atmos. Environ. 42, 4976-4988.
Stella, M.T., Zhang, J.F., Smith, K.R., Ma, Y.Q., Rasmussen, R.A., Khalil, M.A.K., 2003. Characterization of non-methane hydrocarbons emitted from various cookstoves used in China. Environmental Science and Technology 37, 2869–2877.
GZRIEP: Guangzhou Science Research Institute of Environmental Protection, 1998
IPCC: IPCC Guidelines on National Gas Inventories. Reference Manual, 2006.
Wu, R.R., Bo, Y., Li, J., Li, L.Y., Li, Y.Q., Xie, S.D., 2016. Method to establish the emission inventory of anthropogenic volatile organic compounds in china and its application in the period 2008–2012. Atmospheric Environment, 127, 244-254.
EEA: European Environment Agency. Air Pollutant Emission Inventory Guidebook. EEA technical Report No. 12, 2013 EP and CEU, 2013.
MEE: Ministry of Ecology and Environment of the People's Republic of China. Atmospheric Volatile Organic Compounds (vocs) Emission Inventory Guidebook(technical Report), 2017.
Bo, Y., Cai, H., and Xie, S. D., 2008. Spatial and temporal variation of historical anthropogenic NMVOCs emission inventories in China, Atmos. Chem. Phys., 8, 7297-7316.
GB11085-89: Loss of bulk petroleum liquid products, People's Republic of China emission standards.
Qiu, K., Yang, L., Lin, J., Wang, P., Yang, Y., Ye, D., Wang, L., 2014. Historical industrial emissions of non-methane volatile organic compounds in China for the period of 1980–2010. Atmospheric Environment 86, 102-112.
GB18582-2008, Indoor decorating and refurbishing materials—limit of harmful substances of interior architectural coatings.
DB11/1201-2015, Emission standard of volatile organic compounds for printing industry of Beijing.
DB11/1226-2015, Emission standard of air pollutants for industrial surface coating of Beijing.
DB11/1227-2015, Emission standard of air pollutants for painting process of automobile manufacturing industry of Beijing.
GB31572-2015, Emission standard of pollutants for synthetic resin industry.
DB11/1488-2018, Emission standard of air pollutants for catering industry of Beijing.
mass balance：All NMVOCs of the undefined loss of narure gas evaporate into the atmosphere.
Li, J. , Zhou, Y. , Simayi, M. , Deng, Y. , & Xie, S. . (2019). Spatial-temporal variations and reduction potentials of volatile organic compound emissions from the coking industry in china. Journal of Cleaner Production, 214(MAR.20), 224-235.

## Sheet: Table S2
Table S2. A listing of the propensities for secondary organic aerosol formation expressed on a mass emitted basis as SOAPs relative to toluene=100 for 113 organic compounds.
Compound	SOAPi		Compound	SOAPi
Ethane	0.1		Trichloroethylene	0
Propane	0		1,2-Dichloropropane	0
Isobutane	0		Bromodichloromethane	0
n-Butane	0.3		trans-1,3-Dichloropropene	0
Cyclopentane	0		cis-1,3-Dichloropropene	0
Isopentane	0.2		1,1,2-Trichloroethane	0
n-Pentane	0.3		Tetrachloroethylene	0
2,2-Dimethylbutane	0		1,2-Dibromoethane	0
2,3-Dimethylbutane	0		Chlorobenzene	0
2-Methylpentane	0		Bromoform	0
3-Methylpentane	0.2		1,1,2,2-Tetrachloroethane	0
n-Hexane	0.1		1,3-Dichlorobenzene	0
2,4-Dimethylpentane	0		1,4-Dichlorobenzene	0
Methylcyclopentane	0		Benzylchloride	0
2-Methylhexane	0		1,2-Dichlorobenzene	0
Cyclohexane	0		Acrolein	0
2,3-Dimethylpentane	0.4		Propanal	0.5
3-Methylhexane	0		Acetone	0.3
2,2,4-Trimethylpentane	0		Methylacetate	0
n-Heptane	0.1		MTBE	0
Methylcyclohexane	0		Methacrolein	0
2,3,4-Trimethylpentane	0		Vinylacetate	0
2-Methylheptane	0		n-Butanal	0
3-Methylheptane	0		Methylvinylketone	0
Octane	0.8		Methylethylketone	0.6
n-Nonane	1.9		Ethylacetate	0
n-Decane	7		2-Pentanone	0
Udecane	0		n-Pentanal	0
Dodecane	0		3-Pentanone	0
Ethylene	1.3		Methylmethacrylate	0
Propene	1.6		n-Hexanal	0
trans-2-Butene	3.1		n-Butylacetate	0
1-Butene	1.2		Acetylene	0.1
cis-2-Butene	3.6		Acetonitrile	0
trans-2-Pentene	3.1		Benzene	92
Isoprene	1.9		Toluene	100
cis-2-Pentene	3.1		Ethylbenzene	111.6
1-Hexene	0		m/p-Xylene	78.7
Bromomethane	0		o-Xylene	95.5
Chloroethane	0		Styrene	212.3
Freon11(CFCl3)	0		Isopropylbenzene	95.5
Freon113(C2F3Cl3)	0		n-Propylbenzene	109.7
1,1-Dichloroethylene	0		3-Ethyltoluene	100.6
Dichloromethane	0		4-Ethyltoluene	69.7
1,1-Dichloroethane	0		1,3,5-Trimethylbenzene	13.5
cis-1,2-Dichloroethylene	0		2-Ethyltoluene	94.8
Chloroform	0		1,2,4-Trimethylbenzene	20.6
1,1,1-Trichloroethane	0		1,2,3-Trimethylbenzene	43.9
Tetrachloromethane	0		1,3-Diethylbenzene	0
1,2-Dichloroethane	0		1,4-Diethylbenzene	0
Derwent, R. G., Jenkin, M. E., Utembe, S. R., Shallcross, D. E., Murrells, T. P., and Passant, N. R.: Secondary organic aerosol formation from a large number of reactive man-made organic compounds, Sci Total Environ, 408, 3374-3381, https://doi.org/10.1016/j.scitotenv.2010.04.013, 2010

## Sheet: Table S3
Table S3. Enhanced “Ten measures” of air pollution prevention and control taken in Beijing since 2017.
	Control Measures	Detailed Description
1	Coal-to-clean fuels in countryside	Promoting coal-to-clean fuels in 700 villages; forbidding scattered coal combustion in districts of Chaoyang, Haidian, Fengtai, Shijingshan and southern plain of Beijing.
2	Reduce local power plant emissions	Minimizing local emissions from the power sector; deactivating of coal-fired units of Huaneng Beijing thermal power plants after the heating season.
3	Clean-transform of coal fired boiler	Converting the remaining 4,000 tons of coal-fired boilers for industry and heating to gas-fired boilers; weeding out coal-fired boilers with a capacity of not exceeding 10 tons in the outskirts of Beijing
4	Eliminate high-emission vehicles	Governing high-emission vehicles; implementing traffic restriction within 5th ring road of State Ⅰ and State Ⅱ light gasoline vehicles since February 15, 2016 and weeding out 300000 aging motor vehicles for the whole year of 2016.
5	Restrict heavy-duty diesel vehicles	Installing particle traps on additional heavy-duty diesel vehicles.
6	Cut down NOx from fuel gas facilities	Completing the low-nitrogen transformation of 10,000 vapor tons of gas-fired boilers to promote NOx emission reduction comprehensively.
7	Deal with polluters	Accelerating the withdrawal of industrial enterprises; cleaning up 2,560 scattered and polluting enterprises and closing down another 500 general manufacturing and polluting enterprises.
8	Upgrade key VOC emission industries	Promoting the restructuring and upgrading of key VOC emission industries; popularizing aqueous paint to replace greasiness paint in Beijing, Tianjin and hebei.
9	Reinforce regulation	Cracking down the illegal and criminal activities of environmental field severely.
10	Deepen collaboration	Enhancing the coordination and linkage with surrounding areas and well-preparing the emergency work of heavy air pollution.

## Sheet: Table S5
Table S4. The average volume mixing ratios of the 91 measured species during different control scenarios at PKU (ppbv).
Species	Non-controls	Strict controls	Eased controls
Ethane	12.789	6.39027	6.30212
Propane	8.0921	4.25621	3.87014
Isobutane	1.81145	0.930194	0.786833
n-Butane	3.06048	1.62424	1.3735
Isopentane	1.5479	0.966544	0.800112
n-Pentane	1.0393	0.580761	0.464004
2,2-dimethylbutane	0.0403253	0.0203843	0.0196659
2,3-dimethylbutane	0.135131	0.0718509	0.0876889
2-methylpentane	0.806839	0.443728	0.379903
3-methylpentane	0.607971	0.281746	0.230251
cyclopentane	0.223473	0.14576	0.0936453
n-hexane	1.03244	0.550842	0.496445
2,3-dimethylpentane	0.129735	0.0940064	0.0295892
2,4-dimethylpentane	0.0456788	0.00862139	0.0309429
methylcyclopentane	0.477035	0.24946	0.202567
2-methylhexane	0.115017	0.0104699	0.0989349
3-methylhexane	0.218278	0.129191	0.106671
cyclohexane	0.114307	0.0908775	0.0256198
2,2,4-trimethylpentane	0.183693	0.0786643	0.0670556
2,3,4-trimethylpentane	0.101153	0.0168999	0.0836834
n-heptane	0.236274	0.143084	0.121761
methylcyclohexane	0.177575	0.095208	0.0763616
2-methylheptane	0.0836678	0.040052	0.0366785
3-methylheptane	0.0635115	0.0291566	0.0275837
octane	0.15802	0.077464	0.0689673
n-nonane	0.123901	0.0542939	0.0515268
n-decane	0.128206	0.0475344	0.0497517
Udecane	0.0762434	0.025111	0.0409635
Dodecane	0.0708591	0.029995	0.0398114
Ethylene	12.0724	4.59772	4.0292
Propylene	2.10282	0.919436	0.751355
1-Butene	0.38337	0.199068	0.211524
trans-2-Butene	0.10965	0.056467	0.0543288
cis-2-Butene	0.0928815	0.0358056	0.0319948
1-pentene	0.0799614	0.0398733	0.0345733
trans-2-pentene	0.0873968	0.0803396	0.0223694
cis-2-pentene	0.0270161	0.0124855	0.0107012
isoprene	0.117606	0.0505212	0.0414614
1-hexene	0.0534896	0.0245209	0.0484974
1,3-Butadiene	0.172356	0.0999746	0.0882737
Acetylene	8.97985	3.40117	3.21109
benzene	3.26558	1.06151	1.03454
toluene	3.63209	1.46938	1.25818
ethylbenzene	0.960974	0.420711	0.347561
m/p-xylene	0.849392	0.332663	0.276347
o-xylene	0.653378	0.276984	0.230371
styrene	0.367614	0.124112	0.106187
isopropylbenzene	0.076345	0.0400704	0.0411748
n-propylbenzene	0.0711972	0.0310648	0.0367091
3-ethyltoluene	0.287563	0.125924	0.115783
4-ethyltoluene	0.0756468	0.0361143	0.0421772
2-ethyltoluene	0.0978741	0.0434471	0.04473
1,2,4-trimethylbenzene	0.470106	0.244544	0.217425
1,2,3-trimethylbenzene	0.0939658	0.0406694	0.0444227
1,3,5-trimethylbenzene	0.0923412	0.0331939	0.0385144
1,3-diethylbenzene	0.03976	0.0127822	0.0287544
1,4-diethylbenzene	0.0639843	0.0199509	0.0417568
acrolein	0.142144	0.0533396	0.0427272
Propanal	0.530925	0.210716	0.193271
Methacrolein	1.17573	0.245209	0.484974
n-Butanal	0.0797106	0.0370683	0.0477268
n-Pentanal	0.0847038	0.0339942	0.0345867
Acetone	6.36794	2.76561	2.46371
Methylvinylketone	0.496113	0.17941	0.14638
Methylethylketone	0.778202	0.216094	0.284565
2-pentanone	0.108907	0.0434487	0.041582
MTBE	0.995592	0.601612	0.415812
Freon11(CFCl3)	1.3769	1.96304	0.994422
Freon114(C2F4Cl2)	0.0190881	0.0168995	0.0170619
Freon113(C2F3Cl3)	0.109911	0.0917039	0.090772
Chloromethane	0.491877	0.594517	0.560281
Chloroethane	0.0885478	0.0271675	0.029951
Vinylchloride	0.0957224	0.0457451	0.0701366
Bromomethane	0.0885478	0.0271675	0.029951
Dichloromethane	3.09772	1.60317	1.22827
1,1-Dichloroethane	0.165013	0.06717	0.0492105
1,2-Dichloroethane	0.536511	0.324001	0.283337
1,2-Dichloropropane	0.511726	0.181329	0.137076
Bromodichloromethane	0.00199292	0.0014024	0.00138574
1,1,2-Trichloroethane	0.0206824	0.0133257	0.00873685
1,2-Dibromoethane	0.000577671	0.000394849	0.00125733
1,1-Dichloroethylene	0.00433673	0.0029815	0.00274067
cis-1,2-Dichloroethylene	0.0874769	0.040893	0.0391556
trans-1,3-Dichloropropene	0.00875064	0.00352294	0.00320067
Tetrachloroethylene	0.0752472	0.0499204	0.0351175
Chloroform	1.67299	1.01805	0.729331
Benzylchloride	0.00267351	0.00234805	0.00364297
Chlorobenzene	0.0220408	0.0131544	0.0113079
1,2-Dichlorobenzene	0.00582587	0.00381682	0.00922433
1,4-Dichlorobenzene	0.196462	0.0771071	0.0890832
Acetonitrile	1.0127	0.714163	0.890493
Total	89.5194	42.5826	37.9733

## Sheet: Table S6
Table S5. Monthly activity data of difference anthropogenic VOC sources in Beijing for 2016.12-2017.1 and 2017.12-2018.1.
level 3	level 4	unit	2016.12	2017.01		2017.12	2018.01	Reference
Civil scatered coal	Rural residential stctor	104 tons	80	80		36	45	hs/a
	Urban residential sector	104 tons	23	23		15	15	hs/a
	Rural production sector	104 tons	2	2		1	1	n/a
	Commercial and Public sector	104 tons	5.5	5.5		2	2	hs/a
Industrial scattered coal	Industrial sectora	104 tons	43	43		0	0	n/a
Manufacturing		104 tons	10.8	5.4		5.4	5.4	n/a
Power generation		104 tons	9.4	2.8		3.6	2.8	NBS
Heat supply		104 tons	60.09	34.9		34.9	34.9	hs/a
Manufacturing	Liquefied petroleum gas	104 tons	0.186667	0.1075		0.1075	0.1075	n/a
	Liquefied natural gas	104 tons	0.0583333	0.18		0.18	0.18	n/a
	Natural gas	108 m3	1.04	1.07917		1.07917	1.07917	n/a
	Fuel oil	104 tons	0.180833	0.0733333		0.0733333	0.0733333	n/a
Commercial and Public Services	Liquefied petroleum gas	104 tons	1.63417	1.58083		1.58083	1.58083	n/a
	Liquefied natural gas	104 tons	1.14417	1.16583		1.16583	1.16583	n/a
	Natural gas	108 m3	2.50083	2.36083		2.36083	2.36083	n/a
	Fuel oil	104 tons	0.145	0.134167		0.134167	0.134167	n/a
Power generation	Liquefied petroleum gas	104 tons	0.0108333	0.0133333		0.0133333	0.0133333	NBS
	Liquefied natural gas	104 tons	0	0		0	0	NBS
	Natural gas	108 m3	5.36583	4.89		5.87	4.89	NBS
	Fuel oil	104 tons	0	0		0	0	NBS
Heat supply	Liquefied petroleum gas	104 tons	0.2425	0.51		0.51	0.51	hs/a
	Liquefied natural gas	104 tons	0.0425	0.17		0.17	0.17	hs/a
	Natural gas	108 m3	8.05	9.86		9.855	9.855	hs/a
	Fuel oil	104 tons	0.1825	0.08		0.0825	0.0825	hs/a
Resident consumption	Liquefied petroleum gas	104 tons	4.55711	4.49481		4.49481	4.49481	Wu and Xie, 2018
	Liquefied natural gas	104 tons	0	0		0	0	Wu and Xie, 2018
	Natural gas	108 m3	2.03955	2.6075		2.6075	2.6075	Wu and Xie, 2018
Natural gas leakage	Natural gas	108 m3	0.699167	0.538333		0.538333	0.538333	n/a
Natural gas production	Natural gas	108 m3	2.4	2.28		1.8	1.68	NBS
Passenger cars		104 pieces	0.0853029	0.0858876		0.0853029	0.0858876	Li et al., 2017
Light duty vehicles		104 pieces	0.0853029	0.0858876		0.0853029	0.0858876	Li et al., 2017
Heavy duty trucks		104 pieces	0.0853029	0.0858876		0.0853029	0.0858876	Li et al., 2017
Buses		104 pieces	0.0853029	0.0858876		0.0853029	0.0858876	Li et al., 2017
Motorcycles		104 pieces	0.0853029	0.0858876		0.0853029	0.0858876	Li et al., 2017
Aircrafts		104 LTO	5.3799	5.32166		5.32166	5.32166	n/a
Marine vessels		104 tons	0	0		0	0	n/a
Trains		104 tons	2.16667	2.41667		2.41667	2.41667	n/a
Agricultural machinery	Gasoline	104 tons	0.2725	0.25		0.25	0.25	n/a
	Diesel	104 tons	0.220833	0.184167		0.184167	0.184167	n/a
Construction machinery	Gasoline	104 tons	0.698333	0.6775		0.6775	0.6775	n/a
	Diesel	104 tons	1.885	2.11917		2.11917	2.11917	n/a
Traffic evaporation			0.0853029	0.0858876		0.0853029	0.0858876	Li et al., 2017
Petroleum fractionation		104 tons	76.1	78		76.1	86.52	NBS
Petroleum products transport	Crude oil	104 tons	0	0		0	0	n/a
	Gasoline	104 tons	39.1975	40.8208		40.8208	40.8208	n/a
	Diesel	104 tons	14.33	14.5592		14.5592	14.5592	n/a
	Others	104 tons	0.325833	0.206667		0.206667	0.206667	n/a
Petroleum products storage	Crude oil	104 tons	76.4225	81.3165		81.3165	81.3165	n/a
	Gasoline	104 tons	73.5358	78.245		78.245	78.245	n/a
	Diesel	104 tons	91.6067	97.4731		97.4731	97.4731	n/a
	Others	104 tons	37.9533	40.3838		40.3838	40.3838	n/a
Gas station	Gasoline	104 tons	39.1975	40.8208		40.8208	40.8208	n/a
	Diesel	104 tons	14.33	14.5592		14.5592	14.5592	n/a
Raw chemicals	Ethylene	104 tons	6.76	8.022		6.86	7.872	NBS
	Propylene	104 tons	11.8184	14.0247		11.9932	13.7486	NBS
	Benzene	104 tons	1.47818	1.77971		1.52192	1.74467	NBS
	Ethylbenzene	104 tons	8.39892	10.1122		8.64744	9.91313	NBS
	Butadiene	104 tons	2.27719	2.74172		2.34458	2.68774	NBS
	Styrene	104 tons	3.83794	4.62084		3.9515	4.52987	NBS
Fertilizer manufacturing	Synthesis ammonia	104 tons	0	0		0	0	NBS
	Urea	104 tons	0	0		0	0	NBS
Synthetic resin materials manufacturing	PVC	104 tons	0	0		0	0	NBS
	PP	104 tons	5.43306	6.20778		5.41479	6.64671	NBS
	PS	104 tons	0	0		0	0	NBS
	PE	104 tons	5.56694	6.38022		5.56521	6.83134	NBS
Synthetic fiber manufacturing	Cellulosic fiber	104 tons	0.00197778	0.00305143		0.00339048	0.003204	NBS
	Viscose	104 tons	0	0		0	0	NBS
	Acrylonitrile	104 tons	0.353803	0.595757		0.661952	0.625545	NBS
	Nylon	104 tons	0.00025	0.000420966		0.00046774	0.000442015	NBS
	Dacron	104 tons	0.000111111	0.000187096		0.000207885	0.000196451	NBS
	Acrylon	104 tons	0	0		0	0	NBS
	Vinylon	104 tons	0	0		0	0	NBS
	Polypropylene fiber	104 tons	0	0		0	0	NBS
	Synthetic fiber	104 tons	0.01	0.018		0.02	0.0189	NBS
Synthetic rubber manufacturing	Synthetic rubber	104 tons	1.08168	1.82141		2.02379	1.91248	NBS
Pharmaceuticals production		104 tons	0	0		0	0	NBS
Paint		104 tons	2.0329	2.21869		2.21869	2.21869	n/a
Ink		104 tons	0	0		0	0	n/a
Carbon black		104 tons	0	0		0	0	n/a
Food	Vegetable oil extraction process	104 tons	0.283333	0.272274		0.272274	0.272274	n/a
	Sugar	104 tons	0	0		0	0	NBS
	Wine	108 L	0.16064	0.206254		0.165003	0.169587	BBS
	Beer	108 L	0.70096	0.9		0.72	0.74	BBS
	Red wine	108 L	0.0352371	0.0452428		0.0361943	0.0371997	BBS
Non-metal product	Cement manufacturing	104 tons	30.5	17.52		26.14	17.868	NBS
	Flat glass	104 weight boxes	4.67	5.172		5.14	5.22	NBS
	Fiberglass	104 tons	0.315833	0.344699		0.344699	0.344699	n/a
	Ceramics manufacturing	104 pieces	13.9192	15.1913		15.1913	15.1913	n/a
	Asphalt	104 tons	2	2.52		1	1.14	NBS
	Charcoal	104 tons	0	0		0	0	n/a
Iron and Steel	Steel rolling (cold rolling/hot rolling)	104 tons	15.61	17.388		14.43	17.316	NBS
Dyeing cloth		108 m	0	0		0	0	n/a
Rubber products manufacturing	Tire	104 pieces	5.13688	5.60636		5.60636	5.60636	n/a
Polyfoam manufacturing	Polyfoamg	104 tons	0.0434349	0.0441903		0.0345591	0.0468977	NBS
Artificial leather manufacturing	PVC	104 tons	0.0116791	0.0118822		0.00929252	0.0126102	NBS
plastic molding		104 tons	2.24489	2.28065		1.78358	2.42038	NBS
Coke production		104 tons	0	0		0	0	NBS
Pulp manufacturing		104 tons	0.56	0.606		0.43	0.42	NBS
Coal washing		104 tons	28.4	24.24		13.8	17.94	NBS
Artificial panels pulp manufacturing		104 m3	0	0		0	0	n/a
Municipal services	Sewage treatment	104 tons	12733.9	14426.1		14426.1	14426.1	n/a
	Municipal waste incineration	104 tons	22.7083	27.2083		27.2083	27.2083	n/a
	Hazardous waste incineration	104 tons	0.783967	0.862158		0.862158	0.862158	n/a
	Solid waste compostion	104 tons	10.5	13.2667		13.2667	13.2667	n/a
	Solid waste landfill	104 tons	39.4	36.5		36.5	36.5	n/a
Building painting		104 tons	1.26753	1.26624		1.26624	1.26624	n/a
Furniture coating		104 pieces	64.6833	64.6178		64.6178	64.6178	n/a
Traffic equipment coating	Car	104 pieces	20.4194	17.0652		17.3554	15.7171	BBS
	Truck	104 pieces	4.55874	4.86227		4.94495	4.47815	BBS
	Buses	104 pieces	2.50097	1.70127		1.7302	1.56687	BBS
	Motorcycles	104 pieces	0	0		0	0	NBS
	Bicycles	104 pieces	0	0		0	0	NBS
	Ship	104 DWT	0	0		0	0	NBS
	container	104 TEU	0	0		0	0	NBS
Machinery coating	Electrical instrument	104 pieces	61.18	23.82		63.09	16.356	NBS
	Air pollutant control equipment	104 pieces	0.0383	0.00696		0.0227	0.0189	NBS
	Packaging equipment	104 pieces	0.1327	0.10842		0.1279	0.1128	NBS
	Metal smelting equipment	104 pieces	0.08976	0		0	0	NBS
	Metal-cutting machine tool	104 pieces	0.11	0.1131		0.08	0.0783	BBS
Electronics coating	Circuit board	108 pieces	8.41757	5.5		9.57418	11.6	BBS
	Mobile phone	104 pieces	390.94	691.9		813.71	634.3	BBS
	Color television receiver	104 pieces	54.78	36.7		58.08	24	BBS
	Microcomputer	104 pieces	86.09	75		66.31	43.8	BBS
	Air conditioner	104 pieces	0	0		0	0.042	NBS
Vehicle repair		104 pieces	47.6417	49.2417		49.2417	49.2417	n/a
Bituminous Pavement Road		104 tons	0.784167	0.785833		0.785833	0.785833	n/a
Cooking	Catering services	104 capita	181.075	180.892		180.892	180.892	n/a
	Home cooking	104 capita	181.075	180.892		180.892	180.892	n/a
Commercial / Consumer Solvent Use	Aerosol products	104 capita	181.075	180.892		180.892	180.892	n/a
	Household products	104 capita	181.075	180.892		180.892	180.892	n/a
	Makeup	104 capita	181.075	180.892		180.892	180.892	n/a
	Nonindustrial adhesives	104 capita	181.075	180.892		180.892	180.892	n/a
	Space deodorant	104 capita	181.075	180.892		180.892	180.892	n/a
	Insect repellents	104 capita	181.075	180.892		180.892	180.892	n/a
	Laundry detergent and dry cleaning	104 capita	181.075	180.892		180.892	180.892	n/a
Printing	Offset printing ink (thermosetting wheel/cold setting wheel)	104 tons	0.0378057	0.0377675		0.0377675	0.0377675	n/a
	Flexo printing ink (solvent-based/water-based)	104 tons	0.010143	0.0101327		0.0101327	0.0101327	n/a
	Gravure printing ink (solvent-based/water-based)	104 tons	0.0359616	0.0359251		0.0359251	0.0359251	n/a
	Letterpress printing ink	104 tons	0.00645464	0.0064481		0.0064481	0.0064481	n/a
Pesticide utilization		Tons	252.583	227.167		227.167	227.167	n/a
Crop residue	Wheat	104 tons	0	0		0	0	Li et al., 2016
	Rice	104 tons	0	0		0	0	Li et al., 2016
	Maize	104 tons	0	0		0	0	Li et al., 2016
	Others	104 tons	0	0		0	0	Li et al., 2016
Crop residue		104 tons	2.56944	2.52778		2.52778	2.52778	Wu and Xie, 2018
Firewood		104 tons	4.01389	3.94444		3.94444	3.94444	Wu and Xie, 2018
Biogas		108 m3	0.0234389	0.0139111		0.0139111	0.0139111	Wu and Xie, 2018
Annual activity data of other sources without monthly data: different types of Statistical data.
hs/a: Annual activity data divided during heating season averagely.
n/a: Annual activity data divided throughout the year averagely.
NBS: National Bureau of Statistics of China.
BBS: Beijing Municipal Bureau Statistics.
Wu, R. R., and Xie, S. D.: Spatial Distribution of Secondary Organic Aerosol Formation Potential in China Derived from Speciated Anthropogenic Volatile Organic Compound Emissions, Environ Sci Technol, 52, 8146-8156, 10.1021/acs.est.8b01269 2018.
Li, J., Li, Y. Q., Bo, Y., and Xie, S. D.: High-resolution historical emission inventories of crop residue burning in fields in China for the period 1990-2013, Atmos Environ, 138, 152-161, 10.1016/j.atmosenv.2016.05.002 2016.
Li, M., Zhang, Q., Kurokawa, J., Woo, J. H., He, K. B., Lu, Z. F., Ohara, T., Song, Y., Streets, D. G., Carmichael, G. R., Cheng, Y. F., Hong, C. P., Huo, H., Jiang, X. J., Kang, S. C., Liu, F., Su, H., and Zheng, B.: MIX: a mosaic Asian anthropogenic emission inventory under the international collaboration framework of the MICS-Asia and HTAP, Atmos Chem Phys, 17, 935-963, 10.5194/acp-17-935-2017…
a : The estimated value of the consumption of industrial scattered coal has not been determined by existing research, we estimated the value based on the number of banned small-scale industrial boilers in Beijing and other regions, estimated value of total coal burning in Beijing for the whole year, the number of banned “small, clustered, and polluting” factories in Beijing and other regions, and…

## Sheet: Table S7
Table S6. Integrated source profiles for each source used in this study (by weight percentage).
				Alkane1	Alkane2	Alkane3	Alkane4	Alkane5	Alkane6	Alkane7	Alkane8	Alkane9	Alkane10	Alkane11	Alkane12	Alkane13	Alkane14	Alkane15	Alkane16	Alkane17	Alkane18	Alkane19	Alkane20	Alkane21	Alkane22	Alkane23	Alkane24	Alkane25	Alkane26	Alkane27	Alkane28	Alkane29	Alkene1	Alkene2	Alkene3	Alkene4	Alkene5	Alkene6	Alkene7	Alkene8	Alkene9	Alkene10	Alkene11	Alkene12	Alkene13	Alkene14	Alkene15	Alkene16	Athyne1
level 1	level 2	level 3	level 4	Ethane	Propane	i-Butane	n-Butane	Cyclopentane	i-Pentane	n-Pentane	Methylcyclopentane	Cyclohexane	2,2-Dimethylbutane	2,3-Dimethylbutane	2-Methylpentane	3-Methylpentane	n-Hexane	Methylcyclohexane	2,3-DimethylPentane	2,4-Dimethylpentane	2-Methylhexane	3-Methylhexane	n-Heptane	2,2,4-Trimethylpentane	2,3,4-Trimethylpentane	2-Methylheptane	3-Methylheptane	n-Octane	n-Nonane	n-Decane	n-Undecane	n-doundane	Ethene	Propene	1,3-butadiene	1-Butene	i-butene	cis-2-Butene	trans-2-Butene	Isoprene	1-Pentene	cis-2-Pentene	trans-2-Pentene	α-pinene	3-methyl-1-butene	2-methyl-1-butene	2-methyl-2-butene	1-Hexene	Ethyne
Coal burning	Scattered coal	Civil scatered coal	Rural residential stctor	14.7308	5.4144	0.957854	1.96612	0.141157	0.584795	1.0486	0.131075	0.131075	0	0.0403307	0.322646	0.100827	0.857028	0.221819	0.100827	0	0.131075	0.0403307	0.71587	0	0	0	0.120992	0	0.625126	0.494051	0.443638	0.403307	16.7372	7.84432	1.67372	2.70216	0	0.524299	0.705787	0.272232	0.604961	0.171406	0.322646	0	0	0	0	0	3.96249
			Urban residential sector	14.7308	5.4144	0.957854	1.96612	0.141157	0.584795	1.0486	0.131075	0.131075	0	0.0403307	0.322646	0.100827	0.857028	0.221819	0.100827	0	0.131075	0.0403307	0.71587	0	0	0	0.120992	0	0.625126	0.494051	0.443638	0.403307	16.7372	7.84432	1.67372	2.70216	0	0.524299	0.705787	0.272232	0.604961	0.171406	0.322646	0	0	0	0	0	3.96249
			Rural production sector	14.7308	5.4144	0.957854	1.96612	0.141157	0.584795	1.0486	0.131075	0.131075	0	0.0403307	0.322646	0.100827	0.857028	0.221819	0.100827	0	0.131075	0.0403307	0.71587	0	0	0	0.120992	0	0.625126	0.494051	0.443638	0.403307	16.7372	7.84432	1.67372	2.70216	0	0.524299	0.705787	0.272232	0.604961	0.171406	0.322646	0	0	0	0	0	3.96249
			Commercial and Public sector	14.7308	5.4144	0.957854	1.96612	0.141157	0.584795	1.0486	0.131075	0.131075	0	0.0403307	0.322646	0.100827	0.857028	0.221819	0.100827	0	0.131075	0.0403307	0.71587	0	0	0	0.120992	0	0.625126	0.494051	0.443638	0.403307	16.7372	7.84432	1.67372	2.70216	0	0.524299	0.705787	0.272232	0.604961	0.171406	0.322646	0	0	0	0	0	3.96249
		Industrial scattered coal	Industrial sector	13.9088	4.93353	0.24761	0.845783	0.0127039	0.832549	1.00511	0.201871	0.0678713	0	0.0947153	0.469986	0.183888	0.793508	0.188145	0.172431	0.0599127	0.105239	0.0854807	0.900671	0.282	0	0.0250962	0.23783	0.423357	1.34627	1.95424	0.273252	0.263131	17.517	7.79376	0.0472648	1.21593	0.403095	1.09936	0.76431	0	0.454158	0.0543478	0.0567143	0	0.0305817	0.0496321	0.0246626	0.129031	8.11652
	Centralized coal	Manufacturing		13.9088	4.93353	0.24761	0.845783	0.0127039	0.832549	1.00511	0.201871	0.0678713	0	0.0947153	0.469986	0.183888	0.793508	0.188145	0.172431	0.0599127	0.105239	0.0854807	0.900671	0.282	0	0.0250962	0.23783	0.423357	1.34627	1.95424	0.273252	0.263131	17.517	7.79376	0.0472648	1.21593	0.403095	1.09936	0.76431	0	0.454158	0.0543478	0.0567143	0	0.0305817	0.0496321	0.0246626	0.129031	8.11652
		Power generation		13.9088	4.93353	0.24761	0.845783	0.0127039	0.832549	1.00511	0.201871	0.0678713	0	0.0947153	0.469986	0.183888	0.793508	0.188145	0.172431	0.0599127	0.105239	0.0854807	0.900671	0.282	0	0.0250962	0.23783	0.423357	1.34627	1.95424	0.273252	0.263131	17.517	7.79376	0.0472648	1.21593	0.403095	1.09936	0.76431	0	0.454158	0.0543478	0.0567143	0	0.0305817	0.0496321	0.0246626	0.129031	8.11652
		Heat supply		13.9088	4.93353	0.24761	0.845783	0.0127039	0.832549	1.00511	0.201871	0.0678713	0	0.0947153	0.469986	0.183888	0.793508	0.188145	0.172431	0.0599127	0.105239	0.0854807	0.900671	0.282	0	0.0250962	0.23783	0.423357	1.34627	1.95424	0.273252	0.263131	17.517	7.79376	0.0472648	1.21593	0.403095	1.09936	0.76431	0	0.454158	0.0543478	0.0567143	0	0.0305817	0.0496321	0.0246626	0.129031	8.11652
Fuel gas and oil	LPG/LNG/NG/FO	Manufacturing	Liquefied petroleum gas	0.17859	0.478846	0.591229	0.131683	0	0.395781	0	0	1.9447	0	0	0	0	0	0	0	0	0	0	0	0	0	0	0	0	0.967465	5.98558	0	0	0.216214	1.31683	0.0422655	0.564355	0.33959	0.789119	0.26874	0	0	0.0280956	0	0	0.0280956	0.0280956	0.112871	0.112871	0.403111
			Liquefied natural gas	6.54243	3.53555	1.08214	1.30518	0	0.332904	0.456813	0.0379989	0	0	0	0.285818	0	0.256906	0	0.156952	0	0.0429553	0.503899	0.161909	0	0	0	0	0.189995	0	0	0	0	4.72509	0.818629	0	0.0569984	0.113997	4.62596	0.784761	0	0.999537	0	0	0	0	0	0	0	0.983016
			Natural gas	6.54243	3.53555	1.08214	1.30518	0	0.332904	0.456813	0.0379989	0	0	0	0.285818	0	0.256906	0	0.156952	0	0.0429553	0.503899	0.161909	0	0	0	0	0.189995	0	0	0	0	4.72509	0.818629	0	0.0569984	0.113997	4.62596	0.784761	0	0.999537	0	0	0	0	0	0	0	0.983016
			Fuel oil	0.536723	0.308074	0.336956	0.053191	0	0	0	0	0	0	0	0	0	0.0122748	0.34177	0	0	0	0	0.145373	0.743711	0.0490994	0.107345	0	0.293633	0	0	0	0	44.5264	8.35171	0.750931	2.45497	0.859239	0.202655	0.450077	0	1.06863	0.073649	0.122748	0	0.202655	0.23948	0.0981987	1.0566	23.4907
		Hotels and Catering Services	Liquefied petroleum gas	0.17859	0.478846	0.591229	0.131683	0	0.395781	0	0	1.9447	0	0	0	0	0	0	0	0	0	0	0	0	0	0	0	0	0.967465	5.98558	0	0	0.216214	1.31683	0.0422655	0.564355	0.33959	0.789119	0.26874	0	0	0.0280956	0	0	0.0280956	0.0280956	0.112871	0.112871	0.403111
			Liquefied natural gas	6.54243	3.53555	1.08214	1.30518	0	0.332904	0.456813	0.0379989	0	0	0	0.285818	0	0.256906	0	0.156952	0	0.0429553	0.503899	0.161909	0	0	0	0	0.189995	0	0	0	0	4.72509	0.818629	0	0.0569984	0.113997	4.62596	0.784761	0	0.999537	0	0	0	0	0	0	0	0.983016
			Natural gas	6.54243	3.53555	1.08214	1.30518	0	0.332904	0.456813	0.0379989	0	0	0	0.285818	0	0.256906	0	0.156952	0	0.0429553	0.503899	0.161909	0	0	0	0	0.189995	0	0	0	0	4.72509	0.818629	0	0.0569984	0.113997	4.62596	0.784761	0	0.999537	0	0	0	0	0	0	0	0.983016
			Fuel oil	0.536723	0.308074	0.336956	0.053191	0	0	0	0	0	0	0	0	0	0.0122748	0.34177	0	0	0	0	0.145373	0.743711	0.0490994	0.107345	0	0.293633	0	0	0	0	44.5264	8.35171	0.750931	2.45497	0.859239	0.202655	0.450077	0	1.06863	0.073649	0.122748	0	0.202655	0.23948	0.0981987	1.0566	23.4907
		Power generation	Liquefied petroleum gas	0.17859	0.478846	0.591229	0.131683	0	0.395781	0	0	1.9447	0	0	0	0	0	0	0	0	0	0	0	0	0	0	0	0	0.967465	5.98558	0	0	0.216214	1.31683	0.0422655	0.564355	0.33959	0.789119	0.26874	0	0	0.0280956	0	0	0.0280956	0.0280956	0.112871	0.112871	0.403111
			Liquefied natural gas	6.54243	3.53555	1.08214	1.30518	0	0.332904	0.456813	0.0379989	0	0	0	0.285818	0	0.256906	0	0.156952	0	0.0429553	0.503899	0.161909	0	0	0	0	0.189995	0	0	0	0	4.72509	0.818629	0	0.0569984	0.113997	4.62596	0.784761	0	0.999537	0	0	0	0	0	0	0	0.983016
			Natural gas	6.54243	3.53555	1.08214	1.30518	0	0.332904	0.456813	0.0379989	0	0	0	0.285818	0	0.256906	0	0.156952	0	0.0429553	0.503899	0.161909	0	0	0	0	0.189995	0	0	0	0	4.72509	0.818629	0	0.0569984	0.113997	4.62596	0.784761	0	0.999537	0	0	0	0	0	0	0	0.983016
			Fuel oil	0.536723	0.308074	0.336956	0.053191	0	0	0	0	0	0	0	0	0	0.0122748	0.34177	0	0	0	0	0.145373	0.743711	0.0490994	0.107345	0	0.293633	0	0	0	0	44.5264	8.35171	0.750931	2.45497	0.859239	0.202655	0.450077	0	1.06863	0.073649	0.122748	0	0.202655	0.23948	0.0981987	1.0566	23.4907
		Heat supply	Liquefied petroleum gas	0.17859	0.478846	0.591229	0.131683	0	0.395781	0	0	1.9447	0	0	0	0	0	0	0	0	0	0	0	0	0	0	0	0	0.967465	5.98558	0	0	0.216214	1.31683	0.0422655	0.564355	0.33959	0.789119	0.26874	0	0	0.0280956	0	0	0.0280956	0.0280956	0.112871	0.112871	0.403111
			Liquefied natural gas	6.54243	3.53555	1.08214	1.30518	0	0.332904	0.456813	0.0379989	0	0	0	0.285818	0	0.256906	0	0.156952	0	0.0429553	0.503899	0.161909	0	0	0	0	0.189995	0	0	0	0	4.72509	0.818629	0	0.0569984	0.113997	4.62596	0.784761	0	0.999537	0	0	0	0	0	0	0	0.983016
			Natural gas	6.54243	3.53555	1.08214	1.30518	0	0.332904	0.456813	0.0379989	0	0	0	0.285818	0	0.256906	0	0.156952	0	0.0429553	0.503899	0.161909	0	0	0	0	0.189995	0	0	0	0	4.72509	0.818629	0	0.0569984	0.113997	4.62596	0.784761	0	0.999537	0	0	0	0	0	0	0	0.983016
			Fuel oil	0.536723	0.308074	0.336956	0.053191	0	0	0	0	0	0	0	0	0	0.0122748	0.34177	0	0	0	0	0.145373	0.743711	0.0490994	0.107345	0	0.293633	0	0	0	0	44.5264	8.35171	0.750931	2.45497	0.859239	0.202655	0.450077	0	1.06863	0.073649	0.122748	0	0.202655	0.23948	0.0981987	1.0566	23.4907
		Resident consumption	Liquefied petroleum gas	0.17859	0.478846	0.591229	0.131683	0	0.395781	0	0	1.9447	0	0	0	0	0	0	0	0	0	0	0	0	0	0	0	0	0.967465	5.98558	0	0	0.216214	1.31683	0.0422655	0.564355	0.33959	0.789119	0.26874	0	0	0.0280956	0	0	0.0280956	0.0280956	0.112871	0.112871	0.403111
			Liquefied natural gas	6.54243	3.53555	1.08214	1.30518	0	0.332904	0.456813	0.0379989	0	0	0	0.285818	0	0.256906	0	0.156952	0	0.0429553	0.503899	0.161909	0	0	0	0	0.189995	0	0	0	0	4.72509	0.818629	0	0.0569984	0.113997	4.62596	0.784761	0	0.999537	0	0	0	0	0	0	0	0.983016
			Natural gas	6.54243	3.53555	1.08214	1.30518	0	0.332904	0.456813	0.0379989	0	0	0	0.285818	0	0.256906	0	0.156952	0	0.0429553	0.503899	0.161909	0	0	0	0	0.189995	0	0	0	0	4.72509	0.818629	0	0.0569984	0.113997	4.62596	0.784761	0	0.999537	0	0	0	0	0	0	0	0.983016
		Natural gas undefined loss	Natural gas	43.2341	27.6013	5.89858	10.9173	0.1093	2.00217	2.5177	0	0.0322977	0	0	0	0	3.89721	0.0522299	0	0	0	0	0	0	0	0	0	0	0	0	0	0	0	0	0	0	0	0	0	0	0	0	0	0	0	0	0	0	0
		Natural gas extraction	Natural gas	43.2341	27.6013	5.89858	10.9173	0.1093	2.00217	2.5177	0	0.0322977	0	0	0	0	3.89721	0.0522299	0	0	0	0	0	0	0	0	0	0	0	0	0	0	0	0	0	0	0	0	0	0	0	0	0	0	0	0	0	0	0
Traffic exhanst	On-road vehicle exhaust	Passenger cars		2.57087	1.6031	0.36407	1.64146	0.277066	3.91052	1.35492	1.18581	0.286214	0.229307	0.567723	2.34479	1.67886	1.16142	0.638516	0.707873	0.283487	1.33351	1.36308	1.12636	0.81649	0.298522	0.777827	0.950065	0.648048	0.405836	0.649413	0.231687	0.101119	3.85707	2.81419	0.665537	1.30237	1.38074	1.35944	0.288976	0.206878	0.505621	0.273538	0.442534	0	0	0	0	0.481095	1.77365
		Light duty vehicles		2.57087	1.6031	0.36407	1.64146	0.277066	3.91052	1.35492	1.18581	0.286214	0.229307	0.567723	2.34479	1.67886	1.16142	0.638516	0.707873	0.283487	1.33351	1.36308	1.12636	0.81649	0.298522	0.777827	0.950065	0.648048	0.405836	0.649413	0.231687	0.101119	3.85707	2.81419	0.665537	1.30237	1.38074	1.35944	0.288976	0.206878	0.505621	0.273538	0.442534	0	0	0	0	0.481095	1.77365
		Heavy duty trucks		0.910263	1.07994	0.0621949	0.398928	0.130955	1.22265	0.817716	0.607907	0.101294	0.0996304	0.402297	1.19388	0.740784	0.493567	0.255694	0.275659	0.113663	0.474898	0.413489	0.315629	0.112998	0.162007	0.285636	0.31586	0.454575	1.11473	1.79541	2.83127	7.83476	2.46344	1.97847	0	0.871944	0	0.118617	0.17744	0.00915766	0.596405	0.26218	0.318915	0	0	0	0	0.612244	1.57428
		Buses		1.36254	1.70449	0.101798	0.133071	0.0577916	0.267797	0.0750654	0.036105	0.0523511	0	0.00103527	0.365867	0.112736	0.106103	0.157265	0.205777	0.0108704	0.0957787	0.0552682	0.138614	0.0800229	0.0188236	0.14663	0.0855625	0.388919	1.48263	1.84267	3.10563	8.61554	3.99029	3.64765	0	1.25442	0.00931745	0.118714	0.186912	0.00321903	0.660076	0.0466163	0.100076	0	0	0	0	0.658304	1.38919
		Motorcycles		0	0	0.253925	0.692392	1.08952	14.6995	9.68128	2.17292	0.191875	1.89749	1.96173	6.05245	3.78003	1.41162	0.498991	1.09185	2.22552	3.17808	2.68038	2.19891	1.85779	0.922963	1.71988	1.8017	0.925621	0.601906	0	0	0	0	0.220728	0	2.11581	0	0.424707	0.303269	0	1.32314	0.281874	0.493933	0	0	0	0	0.369449	0
	Off-road machinery exhaust	Aircrafts		1.00313	0.211821	0	0	0	0	0.222794	0	0	0	0	0.412155	0	0	0	0	0	0	0	0.0668638	0	0	0	0	0.050105	0.156101	0.468046	0.585015	1.27101	18.3513	5.42471	1.87677	2.09429	0	0.518066	0	0	0.885559	0	0	0	0	0	0	0.880116	4.37752
		Marine vessels		0	0	0	0	0	0	0	0	0	0	0	0	0	0.375436	0	0	0	0	0	0	0	0	0	0	0	9.65406	25.2078	19.3081	14.2129	4.82703	1.85036	0	0.214535	0.670421	0.0536337	0.0804505	0	0.160901	0	0.0536337	0	0.0536337	0	0	0.160901	0.0536337
		Trains		0.594245	0.198082	1.27189	0.104254	0.0104254	0.625521	0.187656	0.15638	0.0312761	0.0625521	0	0.406589	0.125104	0.166806	0.0729775	0.0729775	0.0208507	0.125104	0.364887	0.0729775	0.312761	0.0208507	0.0625521	0	0.145955	0.239783	0.552544	0.271059	0	14.9917	2.71059	0.198082	0.698499	0.959133	0.0938282	0.208507	0	0.333611	0.0312761	0.0417014	0	0	0.0312761	0	0	4.43078
		Agricultural machinery	Gasoline	4.84336	0.172977	0.413223	0.634249	0.221026	5.79473	1.54238	2.77724	0.201807	0.201807	0.88891	3.4163	2.59466	0.845666	0.970594	0.672689	0.254661	1.99885	2.09495	1.22525	0.422833	0.139343	0.922545	2.32078	0.994618	0.562176	0.211416	0.172977	0.163367	5.22295	3.04151	0.922545	2.10936	0	0.369979	0.442053	0.398808	0.456467	0.369979	1.26369	0	0	0	0	1.04747	3.6133
			Diesel	0.910263	1.07994	0.0621949	0.398928	0.130955	1.22265	0.817716	0.607907	0.101294	0.0996304	0.402297	1.19388	0.740784	0.493567	0.255694	0.275659	0.113663	0.474898	0.413489	0.315629	0.112998	0.162007	0.285636	0.31586	0.454575	1.11473	1.79541	2.83127	7.83476	2.46344	1.97847	0	0.871944	0	0.118617	0.17744	0.00915766	0.596405	0.26218	0.318915	0	0	0	0	0.612244	1.57428
		Construction machinery	Gasoline	4.84336	0.172977	0.413223	0.634249	0.221026	5.79473	1.54238	2.77724	0.201807	0.201807	0.88891	3.4163	2.59466	0.845666	0.970594	0.672689	0.254661	1.99885	2.09495	1.22525	0.422833	0.139343	0.922545	2.32078	0.994618	0.562176	0.211416	0.172977	0.163367	5.22295	3.04151	0.922545	2.10936	0	0.369979	0.442053	0.398808	0.456467	0.369979	1.26369	0	0	0	0	1.04747	3.6133
			Diesel	0.910263	1.07994	0.0621949	0.398928	0.130955	1.22265	0.817716	0.607907	0.101294	0.0996304	0.402297	1.19388	0.740784	0.493567	0.255694	0.275659	0.113663	0.474898	0.413489	0.315629	0.112998	0.162007	0.285636	0.31586	0.454575	1.11473	1.79541	2.83127	7.83476	2.46344	1.97847	0	0.871944	0	0.118617	0.17744	0.00915766	0.596405	0.26218	0.318915	0	0	0	0	0.612244	1.57428
Traffic evaporation	Traffic evaporation	Traffic evaporation		0.187245	1.24506	4.03347	6.30202	0.611721	12.162	5.62113	1.26938	0.287487	0.598752	1.5293	5.44605	3.1829	1.48715	0.490674	0.483108	0.322207	1.49364	1.18237	0.87327	0.840171	0.443274	0.389081	0.896506	0.488512	0.140501	0.0972701	0.0778161	0	0.365979	0.868947	0.259387	2.47498	1.45905	3.45309	3.60008	0.442579	4.50037	2.71492	1.93135	0	0	0	0	1.18237	0.0166749
Petroleum-related evaporation	Petroleum	Petroleum fractionation		16.4466	7.84726	2.66284	5.0078	0.456548	3.31335	3.69481	1.3612	4.03001	0.21608	0.358073	2.28856	2.02536	3.80745	1.37639	1.67541	0.202184	0.724573	1.05816	2.14	0.380559	0.134736	0.379052	4.18343	1.39154	1.14236	0.375134	0.251996	0.0848263	3.45808	3.33331	0.512351	1.08982	0	0.449744	0.565772	0.128806	0.300178	0.17	0.288001	0	0	0	0	0.248082	0.908386
		Petroleum products transport	Crude oil	0.119796	1.17296	4.35041	9.7462	0.269542	13.5132	8.99079	0	0.979122	0.637131	0.85653	3.29959	2.55654	1.77589	1.87302	0.28493	0.357697	0.807989	0.224618	1.62789	0.434262	0.273069	0.0898473	0	0.655495	0.967033	0.644642	0.241884	0.222788	0.224618	1.24055	0.17823	1.39309	0	2.68641	2.69199	0	2.15071	1.88318	0.708795	0	0	0	0	0.0748727	0.00998303
			Gasoline	0.119796	1.17296	4.35041	9.7462	0.269542	13.5132	8.99079	0	0.979122	0.637131	0.85653	3.29959	2.55654	1.77589	1.87302	0.28493	0.357697	0.807989	0.224618	1.62789	0.434262	0.273069	0.0898473	0	0.655495	0.967033	0.644642	0.241884	0.222788	0.224618	1.24055	0.17823	1.39309	0	2.68641	2.69199	0	2.15071	1.88318	0.708795	0	0	0	0	0.0748727	0.00998303
			Diesel	0.119796	1.17296	4.35041	9.7462	0.269542	13.5132	8.99079	0	0.979122	0.637131	0.85653	3.29959	2.55654	1.77589	1.87302	0.28493	0.357697	0.807989	0.224618	1.62789	0.434262	0.273069	0.0898473	0	0.655495	0.967033	0.644642	0.241884	0.222788	0.224618	1.24055	0.17823	1.39309	0	2.68641	2.69199	0	2.15071	1.88318	0.708795	0	0	0	0	0.0748727	0.00998303
			Others	0.119796	1.17296	4.35041	9.7462	0.269542	13.5132	8.99079	0	0.979122	0.637131	0.85653	3.29959	2.55654	1.77589	1.87302	0.28493	0.357697	0.807989	0.224618	1.62789	0.434262	0.273069	0.0898473	0	0.655495	0.967033	0.644642	0.241884	0.222788	0.224618	1.24055	0.17823	1.39309	0	2.68641	2.69199	0	2.15071	1.88318	0.708795	0	0	0	0	0.0748727	0.00998303
		Petroleum products storage	Crude oil	0.119796	1.17296	4.35041	9.7462	0.269542	13.5132	8.99079	0	0.979122	0.637131	0.85653	3.29959	2.55654	1.77589	1.87302	0.28493	0.357697	0.807989	0.224618	1.62789	0.434262	0.273069	0.0898473	0	0.655495	0.967033	0.644642	0.241884	0.222788	0.224618	1.24055	0.17823	1.39309	0	2.68641	2.69199	0	2.15071	1.88318	0.708795	0	0	0	0	0.0748727	0.00998303
			Gasoline	0.119796	1.17296	4.35041	9.7462	0.269542	13.5132	8.99079	0	0.979122	0.637131	0.85653	3.29959	2.55654	1.77589	1.87302	0.28493	0.357697	0.807989	0.224618	1.62789	0.434262	0.273069	0.0898473	0	0.655495	0.967033	0.644642	0.241884	0.222788	0.224618	1.24055	0.17823	1.39309	0	2.68641	2.69199	0	2.15071	1.88318	0.708795	0	0	0	0	0.0748727	0.00998303
			Diesel	0.119796	1.17296	4.35041	9.7462	0.269542	13.5132	8.99079	0	0.979122	0.637131	0.85653	3.29959	2.55654	1.77589	1.87302	0.28493	0.357697	0.807989	0.224618	1.62789	0.434262	0.273069	0.0898473	0	0.655495	0.967033	0.644642	0.241884	0.222788	0.224618	1.24055	0.17823	1.39309	0	2.68641	2.69199	0	2.15071	1.88318	0.708795	0	0	0	0	0.0748727	0.00998303
			Others	0.119796	1.17296	4.35041	9.7462	0.269542	13.5132	8.99079	0	0.979122	0.637131	0.85653	3.29959	2.55654	1.77589	1.87302	0.28493	0.357697	0.807989	0.224618	1.62789	0.434262	0.273069	0.0898473	0	0.655495	0.967033	0.644642	0.241884	0.222788	0.224618	1.24055	0.17823	1.39309	0	2.68641	2.69199	0	2.15071	1.88318	0.708795	0	0	0	0	0.0748727	0.00998303
		Gas station	Gasoline	0.331135	2.82206	4.28235	4.26587	0.329998	5.98426	3.59949	1.01983	0.2599	0.582477	1.89317	8.73448	2.43349	1.33156	0.28107	0.399859	0.197499	1.70021	1.13199	0.784496	0.267417	0.154861	0.24232	1.30383	1.7493	0.151144	0.0099995	0	0	1.35739	0.891164	0	1.95604	0	2.33492	2.87615	0.0949146	0.354693	2.57857	0.477242	0	0	0	0	0.178629	0.0549939
			Diesel	0.331135	2.82206	4.28235	4.26587	0.329998	5.98426	3.59949	1.01983	0.2599	0.582477	1.89317	8.73448	2.43349	1.33156	0.28107	0.399859	0.197499	1.70021	1.13199	0.784496	0.267417	0.154861	0.24232	1.30383	1.7493	0.151144	0.0099995	0	0	1.35739	0.891164	0	1.95604	0	2.33492	2.87615	0.0949146	0.354693	2.57857	0.477242	0	0	0	0	0.178629	0.0549939
VOC-related industrial	Raw chemicals manufacturing	Raw chemicals	Ethylene	3.52553	2.51162	0.405435	0.849899	0.0617885	10.6588	0.68511	0.0765386	0.0472738	0.069155	0.0645446	0.295061	0.172887	0.297332	0.0604075	0.0214435	0.0160827	0.0536035	0.0589639	0.15813	0.0122186	0.149678	0.03361	0.0488873	0.15887	0.209275	0.384407	0	0	5.90786	20.1972	0.160596	9.82283	0	0.0260181	0.115314	0.300601	0.015009	0.00938062	0.0112567	0	0	0	0	0.0247625	0.497652
			Propylene	3.52553	2.51162	0.405435	0.849899	0.0617885	10.6588	0.68511	0.0765386	0.0472738	0.069155	0.0645446	0.295061	0.172887	0.297332	0.0604075	0.0214435	0.0160827	0.0536035	0.0589639	0.15813	0.0122186	0.149678	0.03361	0.0488873	0.15887	0.209275	0.384407	0	0	5.90786	20.1972	0.160596	9.82283	0	0.0260181	0.115314	0.300601	0.015009	0.00938062	0.0112567	0	0	0	0	0.0247625	0.497652
			Benzene	0	0	0	0	0	0	0	0	0	0	0	0	0	0	0	0	0	0	0	0	0	0	0	0	0	0	0	0	0	0	0	0	0	0	0	0	0	0	0	0	0	0	0	0	0	0
			Ethylbenzene	0	0	0	0	0	0	0	0	0	0	0	0	0	0	0	0	0	0	0	0	0	0	0	0	0	0	0	0	0	0	0	0	0	0	0	0	0	0	0	0	0	0	0	0	0	0
			Butadiene	0	0	0	0	0	0	0	0	0	0	0	0	0	0	0	0	0	0	0	0	0	0	0	0	0	0	0	0	0	0	0	50	0	0	0	0	0	0	0	0	0	0	0	0	0	0
			Styrene	0	0	0	0	0	0	0	0	0	0	0	0	0	0	0	0	0	0	0	0	0	0	0	0	0	0	0	0	0	0	0	0	0	0	0	0	0	0	0	0	0	0	0	0	0	0
	Synthetic product manufacturing	Fertilizer manufacturing	Synthesis ammonia	10.1655	22.3303	19.697	10.9746	0.338742	2.48892	1.50938	0.411762	0.309004	0.297677	0.333327	0.635626	0.449087	0.476573	0.387921	0.302518	0.306695	0.379492	0.366632	0.411574	0.286175	0.278939	0.303014	0.30448	2.17963	1.77814	2.13354	0.481039	0	1.46853	7.14155	0	0.211265	0	0.283969	0.291257	0.308675	0.325137	0.290924	0.327713	0	0	0	0	0.332212	1.18864
			Urea	10.1655	22.3303	19.697	10.9746	0.338742	2.48892	1.50938	0.411762	0.309004	0.297677	0.333327	0.635626	0.449087	0.476573	0.387921	0.302518	0.306695	0.379492	0.366632	0.411574	0.286175	0.278939	0.303014	0.30448	2.17963	1.77814	2.13354	0.481039	0	1.46853	7.14155	0	0.211265	0	0.283969	0.291257	0.308675	0.325137	0.290924	0.327713	0	0	0	0	0.332212	1.18864
		Synthetic resin materials manufacturing	PVC	2.17789	1.89433	0.282688	0.676458	0.758342	0.430767	0.347393	5.63255	0.220844	0.64524	1.17222	8.25119	12.3384	33.8058	0.033094	0.0410123	0.101325	0.0554817	0.0506572	0.108551	0.00824787	0.03849	0.0275001	0.148501	1.43813	0.11116	1.02766	0	0	0.594345	0.3896	0.00911526	0.31695	0	0.0123526	0.0165339	0.127897	0.0219515	0.00675429	0.00844287	0	0	0	0	0.020261	0.470487
			PP	4.53973	2.55554	0.556727	0.824354	0.124647	1.60237	0.774419	0.10407	0.0666048	0.059678	0.153458	0.230187	0.264288	0.447533	0.063138	0.0297401	0.0247834	0.079299	0.0743428	0.20816	0.0225947	0.0282433	0.0395511	0.0678018	0.225986	0.272797	0.373018	0	0	6.504	20.3078	0.155176	0.276202	0	0.0291369	0.451652	0.565979	0.0693866	0.0242853	0.0346933	0	0	0	0	0.108233	1.77729
			PS	0	0	0	0	0	0	0	0	0	0	0	0	0	0	0	0	0	0	0	0	0	0	0	0	0	0	0	0	0	0	0	0	0	0	0	0	0	0	0	0	0	0	0	0	0	0
			PE	4.53973	2.55554	0.556727	0.824354	0.124647	1.60237	0.774419	0.10407	0.0666048	0.059678	0.153458	0.230187	0.264288	0.447533	0.063138	0.0297401	0.0247834	0.079299	0.0743428	0.20816	0.0225947	0.0282433	0.0395511	0.0678018	0.225986	0.272797	0.373018	0	0	6.504	20.3078	0.155176	0.276202	0	0.0291369	0.451652	0.565979	0.0693866	0.0242853	0.0346933	0	0	0	0	0.108233	1.77729
		Synthetic fiber manufacturing	Cellulosic fiber	0	0	0	0	0	0	0	0	0	0	0	0	0	0	0	0	0	0	0	0	0	0	0	0	0	0	0	0	0	0	0	0	0	0	0	0	0	0	0	0	0	0	0	0	0	0
			Viscose	0	0	0	0	0	0	0	0	0	0	0	0	0	0	0	0	0	0	0	0	0	0	0	0	0	0	0	0	0	0	0	0	0	0	0	0	0	0	0	0	0	0	0	0	0	0
			Acrylonitrile	0	0	0	0	0	0	0	0	0	0	0	0	0	0	0	0	0	0	0	0	0	0	0	0	0	0	0	0	0	0	0	0	0	0	0	0	0	0	0	0	0	0	0	0	0	0
			Nylon	0	0	0	0	0	0	0	0	0	0	0	0	0	0	0	0	0	0	0	0	0	0	0	0	0	0	0	0	0	0	0	0	0	0	0	0	0	0	0	0	0	0	0	0	0	0
			Dacron	0	0	0	0	0	0	0	0	0	0	0	0	0	0	0	0	0	0	0	0	0	0	0	0	0	0	0	0	0	0	0	0	0	0	0	0	0	0	0	0	0	0	0	0	0	0
			Acrylon	0	0	0	0	0	0	0	0	0	0	0	0	0	0	0	0	0	0	0	0	0	0	0	0	0	0	0	0	0	0	0	0	0	0	0	0	0	0	0	0	0	0	0	0	0	0
			Vinylon	0	0	0	0	0	0	0	0	0	0	0	0	0	0	0	0	0	0	0	0	0	0	0	0	0	0	0	0	0	0	0	0	0	0	0	0	0	0	0	0	0	0	0	0	0	0
			Polypropylene fiber	0	0	0	0	0	0	0	0	0	0	0	0	0	0	0	0	0	0	0	0	0	0	0	0	0	0	0	0	0	0	0	0	0	0	0	0	0	0	0	0	0	0	0	0	0	0
			Synthetic fiber	0	0	0	0	0	0	0	0	0	0	0	0	0	0	0	0	0	0	0	0	0	0	0	0	0	0	0	0	0	0	0	0	0	0	0	0	0	0	0	0	0	0	0	0	0	0
		Synthetic rubber manufacturing	Synthetic rubber	0.944697	0.596047	0.134588	0.183376	0.526794	0.135496	0.158244	8.20826	0.294182	0.409927	1.04195	8.32966	13.6221	45.3466	0.0134598	0.0302207	0.140114	0.0302176	0.0192294	0.0370853	0.00626176	0.00469632	0.00939511	0.0250536	0.0375771	0.0597779	0.0955742	0	0	0.177178	0.178486	0	0.0261009	0	0.0157574	0.0134067	0	0.0124991	0.00673029	0.00288441	0.00288441	0.00288441	0.00288441	0.00288441	0.00807559	0.349497
		Pharmaceuticals production		0	0	0	0	0	0	0	0	0	0	0	0	0	0	0	0	0	0	0	0	0	0	0	0	0	0	0	0	0	0	0	0	0	0	0	0	0	0	0	0	0	0	0	0	0	0
	Paint & related manufacturing	Paint		5.81745	3.17788	0.263293	2.59681	0.126766	0.166505	4.51916	0.393772	0.154811	0.813816	0.34356	0.963075	0.701313	2.88626	1.85297	0.0841765	8.79912	1.22872	0.263731	0.694998	0.0683885	0.0469155	0.383983	0.168515	0.778648	0.637578	0.287809	0.156595	1.13263	0.0668673	0.275684	0	0.0351692	2.03945	0.0146173	0.0188243	0.0675276	0.270339	0.277906	0.602459	0	0	0	0	0.314755	0
		Ink		5.81745	3.17788	0.263293	2.59681	0.126766	0.166505	4.51916	0.393772	0.154811	0.813816	0.34356	0.963075	0.701313	2.88626	1.85297	0.0841765	8.79912	1.22872	0.263731	0.694998	0.0683885	0.0469155	0.383983	0.168515	0.778648	0.637578	0.287809	0.156595	1.13263	0.0668673	0.275684	0	0.0351692	2.03945	0.0146173	0.0188243	0.0675276	0.270339	0.277906	0.602459	0	0	0	0	0.314755	0
		Carbon black		5.81745	3.17788	0.263293	2.59681	0.126766	0.166505	4.51916	0.393772	0.154811	0.813816	0.34356	0.963075	0.701313	2.88626	1.85297	0.0841765	8.79912	1.22872	0.263731	0.694998	0.0683885	0.0469155	0.383983	0.168515	0.778648	0.637578	0.287809	0.156595	1.13263	0.0668673	0.275684	0	0.0351692	2.03945	0.0146173	0.0188243	0.0675276	0.270339	0.277906	0.602459	0	0	0	0	0.314755	0
	Food manufacturing	Food	Vegetable oil extraction process	0	0	0	0	0	0	0	0	0	0	0	0	0	59.2	0	0	0	0	0	0	0	0	0	0	0	0	0	0	0	0	0	0	0	0	0	0	0	0	0	0	0	0	0	0	0	0
			Sugar	0	8.85	43.87	4.59	0	0	0	0	0	0	0	0	0	0	0	0	0	0	0	0	0	0	0	0	0	0	0	0	0	0	0	0	0	0	0	0	0	0	0	0	0	0	0	0	0	0
			Wine	0	0	0	0	0	0	0	0	0	0	0	0	0	0	0	0	0	0	0	0	0	0	0	0	0	0	0	0	0	0	0	0	0	0	0	0	0	0	0	0	0	0	0	0	0	0
			Beer	0	0	0	0	0	0	0	0	0	0	0	0	0	0	0	0	0	0	0	0	0	0	0	0	0	0	0	0	0	0	0	0	0	0	0	0	0	0	0	0	0	0	0	0	0	0
			Red wine	0	0	0	0	0	0	0	0	0	0	0	0	0	0	0	0	0	0	0	0	0	0	0	0	0	0	0	0	0	0	0	0	0	0	0	0	0	0	0	0	0	0	0	0	0	0
	Non-metal product manufacturing	Non-metal product	Cement manufacturing	0	0	0	0	0	0	0	0	0	0	0	0	0	0	0	0	0	0	0	0	0	0	0	0	0	0	2.87	7.78	28.14	0	0	0	0	0	0	0	0	0	0	0	0	0	0	0	0	0
			Flat glass	0	3.20961	0.652193	2.58438	0.252918	0.685573	1.73704	0	4.45751	0.218254	0.224673	1.19141	0.690709	1.32493	1.29283	0.345354	0.143791	0.437791	0	3.05684	0	0	0	0	1.22479	5.15721	10.5802	9.23085	22.1014	0	1.53548	0.259337	1.23763	0	0.270891	0.0924369	0	0.462184	0.716386	0	0	0	0	0	0	0
			Fiberglass	0	3.20961	0.652193	2.58438	0.252918	0.685573	1.73704	0	4.45751	0.218254	0.224673	1.19141	0.690709	1.32493	1.29283	0.345354	0.143791	0.437791	0	3.05684	0	0	0	0	1.22479	5.15721	10.5802	9.23085	22.1014	0	1.53548	0.259337	1.23763	0	0.270891	0.0924369	0	0.462184	0.716386	0	0	0	0	0	0	0
			Ceramics manufacturing	0	3.20961	0.652193	2.58438	0.252918	0.685573	1.73704	0	4.45751	0.218254	0.224673	1.19141	0.690709	1.32493	1.29283	0.345354	0.143791	0.437791	0	3.05684	0	0	0	0	1.22479	5.15721	10.5802	9.23085	22.1014	0	1.53548	0.259337	1.23763	0	0.270891	0.0924369	0	0.462184	0.716386	0	0	0	0	0	0	0
			Asphalt	0	3.20961	0.652193	2.58438	0.252918	0.685573	1.73704	0	4.45751	0.218254	0.224673	1.19141	0.690709	1.32493	1.29283	0.345354	0.143791	0.437791	0	3.05684	0	0	0	0	1.22479	5.15721	10.5802	9.23085	22.1014	0	1.53548	0.259337	1.23763	0	0.270891	0.0924369	0	0.462184	0.716386	0	0	0	0	0	0	0
			Charcoal	0	3.20961	0.652193	2.58438	0.252918	0.685573	1.73704	0	4.45751	0.218254	0.224673	1.19141	0.690709	1.32493	1.29283	0.345354	0.143791	0.437791	0	3.05684	0	0	0	0	1.22479	5.15721	10.5802	9.23085	22.1014	0	1.53548	0.259337	1.23763	0	0.270891	0.0924369	0	0.462184	0.716386	0	0	0	0	0	0	0
	Iron and Steel Production	Iron and Steel	Steel rolling (cold rolling/hot rolling)	0	0	0	1.46913	0.615029	4.78481	2.37467	0.279868	0.457129	0.395872	1.07524	1.56239	1.73754	1.48127	0.59545	0.328103	0.175152	0.927365	1.42602	1.74618	0.444832	0.626933	0.682378	1.08094	1.25699	0.647333	0.398615	0	0	0	0	0	1.99185	0	0.167821	0.184903	0.574823	0.218127	0.300138	0.373261	0	0	0	0	0.854635	0
	Other manufacturing	Dyeing cloth		0.451795	0.275854	0.142518	0.19957	0.0244111	0.19121	0.150347	0.0220472	0.0228685	0.000305526	0.0694049	0.0626659	0.0254169	0.0458426	0.0331598	0.0102568	0.00428339	0.0231813	0.0169722	0.0289051	0.00767737	0.0170506	0.0134056	0.0660162	0.0582982	0.205953	0.229414	1.36116	0	0.809696	0.304928	0.0277069	0.260622	0	0.0664628	0.0661394	0.00789415	0.00433687	0.00184447	0.00336972	0.00336972	0.00336972	0.00336972	0.00336972	0.11813	0.225146
		Rubber products manufacturing	Tire	0.853718	0.472006	0.167685	0.241542	0.224599	0.516546	0.396466	1.09512	0.667638	0.0504837	0.15852	1.50759	0.997619	2.83407	0.541137	1.04994	0.556557	3.15714	4.1476	4.4153	0.0392069	0.0375522	0.462792	0.373243	0.81488	0.234788	0.89155	1.4722	0	0.27961	0.123868	0.00930823	0	0	0	0	0.0680355	0.0214608	0.00720281	0.0107873	0	0	0	0	0.281273	0.180153
		Polyfoam manufacturing	Polyfoamg	0	0	0	0	0	0	0	0	0	0	0	0	0	0	0	0	0	0	0	0	0	0	0	0	0	0	0	0	0	0	0	0	0	0	0	0	0	0	0	0	0	0	0	0	0	0
		Artificial leather manufacturing	PVC	0	0	0	0	0	0	0	0	0	0	0	0	0	0	0	0	0	0	0	0	0	0	0	0	0	0	0	0	0	0	0	0	0	0	0	0	0	0	0	0	0	0	0	0	0	0
		plastic molding		0	0	0	0	0	0	0	0	0	0	0	0	0	0	0	0	0	0	0	0	0	0	0	0	0	0	0	0	0	0	0	0	0	0	0	0	0	0	0	0	0	0	0	0	0	0
		Coke production		10.1836	2.01355	0.424971	1.93143	0.8703	4.9345	2.56212	0.828609	0.738792	0.362355	0.451551	1.61986	1.453	3.04708	1.35981	2.43114	0.861401	0.569221	8.94754	5.52635	1.16701	0.290821	0.942272	1.15071	1.087	0.265196	0.0697379	0.0341243	0.0208978	4.22853	3.37343	0.339347	2.10285	0	0.382037	0.47418	0.674796	0.282713	0.288592	0.352679	0	0	0	0	0.401342	0.861227
		Pulp manufacturing		0	0	0	0	0	0	0	0	0	0	0	0	0	0.00165594	0	0	0	0	0	0	0	0	0	0	0	0	0	0	0	0	0	0	0	0	0	0	0	0	0	0	0	0	0	0	0	0
		Coal washing		32.7704	31.2586	6.64233	13.2992	0.00819569	4.25694	3.98607	0	0.0131119	0	0	0	0	0.0478266	0.0191221	0	0	0	0	0.0204913	0	0	0	0	0	0	0	0	0	0	0	0	0	0	0	0	0	0	0	0	0	0	0	0	0	0
		Artificial panels pulp manufacturing		0	0	0	0	0	0	0	0	0	0	0	0	0	0	0	0	0	0	0	0	0	0	0	0	0	0	0	0	0	0	0	0	0	0	0	0	0	0	0	0	0	0	0	0	0	0
	Waste disposal	Municipal services	Sewage treatment	10.0756	11.1306	3.38307	5.7266	0.665539	2.55952	2.63615	0.758095	0.56852	0.351105	0.403465	0.995161	1.63549	1.36395	0.699872	0.477124	0.348034	0.567428	0.589379	1.0017	0.319568	0.318609	0.434701	0.380933	0.594309	0.498156	0.356084	0.522513	0	8.95459	24.0498	0	1.70852	0	0.488978	0.50704	0.343892	0.671995	0.358608	0.438567	0	0	0	0	0.653607	1.52505
			Municipal waste incineration	4.10098	0	0	0.628617	0	0.798244	7.41369	2.5444	0.86809	11.1056	0.578727	0.778288	1.49671	3.81161	0.119737	0.309319	6.55558	1.85592	0	1.15745	0.159649	0.299341	0.548793	0.468968	0.329276	2.84374	0	0	0	0	0	0	0.169627	0	2.1353	1.36699	2.85372	2.1353	0	0.678507	0	0	0	0	0.927958	3.08322
			Hazardous waste incineration	4.10098	0	0	0.628617	0	0.798244	7.41369	2.5444	0.86809	11.1056	0.578727	0.778288	1.49671	3.81161	0.119737	0.309319	6.55558	1.85592	0	1.15745	0.159649	0.299341	0.548793	0.468968	0.329276	2.84374	0	0	0	0	0	0	0.169627	0	2.1353	1.36699	2.85372	2.1353	0	0.678507	0	0	0	0	0.927958	3.08322
			Solid waste compostion	7.69231	7.69231	7.69231	15.3846	7.69231	0	7.69231	0	0	0	0	0	0	0	0	0	0	0	0	0	0	0	0	0	0	0	0	0	0	0	0	0	0	0	0	0	0	0	0	0	0	0	0	0	0	0
			Solid waste landfill	7.69231	7.69231	7.69231	15.3846	7.69231	0	7.69231	0	0	0	0	0	0	0	0	0	0	0	0	0	0	0	0	0	0	0	0	0	0	0	0	0	0	0	0	0	0	0	0	0	0	0	0	0	0	0
	Surface coating	Building painting		0	3.49181	0.403248	2.47437	0.00999332	2.0712	3.57226	0	0.164396	0.300309	0.0304791	3.04459	2.16114	2.27157	0.886443	0.182386	0.142912	1.49406	0	2.48194	0.249345	0	0	0.330132	0.58608	0.802271	0.92479	0.736457	0.321441	0	1.81836	0	1.63947	0	0.393255	0.211867	0	0.320296	0.310802	0	0	0	0	0	0	0
		Furniture coating		0.0180939	0.0391823	0.0350735	0.0618816	0.00428326	0.0779872	0.0450603	0.0442768	0.0498427	0.00150373	0.0152047	0.0400248	0.0748348	0.156667	0.295138	0.0426142	0	0.919927	0.142135	0.460778	0	0.00340454	0.215244	0.237193	0.507767	0.320159	0.350636	0.00668869	0.0105969	0.0206787	0.0447749	0	0.0105702	0	0.00258484	0.00258484	0.00470382	0	0.00258484	0.00258484	0	0	0	0	0.00516968	0
		Traffic equipment coating	Car	0.110844	0.0682278	0.0496192	0.0516677	0.0322142	0.218377	0.0839511	0.0347805	0.00616651	0.00411155	0.0102777	0.0539188	0.0506614	0.08721	0.0579332	0.0368376	0.00616692	0.176119	0.0846539	0.0830205	0.00205537	0.028614	0.0368359	0.0409475	0.94827	0.362896	0.504057	0.020807	0.0152744	0.0717829	0.147508	0.00205537	0.0226115	0	0.0123338	0.0143892	0.00205537	0.00822228	0.0327252	0.00822146	0	0	0	0	0.0675049	0.0164462
			Truck	0.110844	0.0682278	0.0496192	0.0516677	0.0322142	0.218377	0.0839511	0.0347805	0.00616651	0.00411155	0.0102777	0.0539188	0.0506614	0.08721	0.0579332	0.0368376	0.00616692	0.176119	0.0846539	0.0830205	0.00205537	0.028614	0.0368359	0.0409475	0.94827	0.362896	0.504057	0.020807	0.0152744	0.0717829	0.147508	0.00205537	0.0226115	0	0.0123338	0.0143892	0.00205537	0.00822228	0.0327252	0.00822146	0	0	0	0	0.0675049	0.0164462
			Buses	0.110844	0.0682278	0.0496192	0.0516677	0.0322142	0.218377	0.0839511	0.0347805	0.00616651	0.00411155	0.0102777	0.0539188	0.0506614	0.08721	0.0579332	0.0368376	0.00616692	0.176119	0.0846539	0.0830205	0.00205537	0.028614	0.0368359	0.0409475	0.94827	0.362896	0.504057	0.020807	0.0152744	0.0717829	0.147508	0.00205537	0.0226115	0	0.0123338	0.0143892	0.00205537	0.00822228	0.0327252	0.00822146	0	0	0	0	0.0675049	0.0164462
			Motorcycles	0.110844	0.0682278	0.0496192	0.0516677	0.0322142	0.218377	0.0839511	0.0347805	0.00616651	0.00411155	0.0102777	0.0539188	0.0506614	0.08721	0.0579332	0.0368376	0.00616692	0.176119	0.0846539	0.0830205	0.00205537	0.028614	0.0368359	0.0409475	0.94827	0.362896	0.504057	0.020807	0.0152744	0.0717829	0.147508	0.00205537	0.0226115	0	0.0123338	0.0143892	0.00205537	0.00822228	0.0327252	0.00822146	0	0	0	0	0.0675049	0.0164462
			Bicycles	0.110844	0.0682278	0.0496192	0.0516677	0.0322142	0.218377	0.0839511	0.0347805	0.00616651	0.00411155	0.0102777	0.0539188	0.0506614	0.08721	0.0579332	0.0368376	0.00616692	0.176119	0.0846539	0.0830205	0.00205537	0.028614	0.0368359	0.0409475	0.94827	0.362896	0.504057	0.020807	0.0152744	0.0717829	0.147508	0.00205537	0.0226115	0	0.0123338	0.0143892	0.00205537	0.00822228	0.0327252	0.00822146	0	0	0	0	0.0675049	0.0164462
			Ship	0.110844	0.0682278	0.0496192	0.0516677	0.0322142	0.218377	0.0839511	0.0347805	0.00616651	0.00411155	0.0102777	0.0539188	0.0506614	0.08721	0.0579332	0.0368376	0.00616692	0.176119	0.0846539	0.0830205	0.00205537	0.028614	0.0368359	0.0409475	0.94827	0.362896	0.504057	0.020807	0.0152744	0.0717829	0.147508	0.00205537	0.0226115	0	0.0123338	0.0143892	0.00205537	0.00822228	0.0327252	0.00822146	0	0	0	0	0.0675049	0.0164462
			container	0.110844	0.0682278	0.0496192	0.0516677	0.0322142	0.218377	0.0839511	0.0347805	0.00616651	0.00411155	0.0102777	0.0539188	0.0506614	0.08721	0.0579332	0.0368376	0.00616692	0.176119	0.0846539	0.0830205	0.00205537	0.028614	0.0368359	0.0409475	0.94827	0.362896	0.504057	0.020807	0.0152744	0.0717829	0.147508	0.00205537	0.0226115	0	0.0123338	0.0143892	0.00205537	0.00822228	0.0327252	0.00822146	0	0	0	0	0.0675049	0.0164462
		Machinery coating	Electrical instrument	0.389394	0.15628	0.171338	0.212471	0.0216587	0.293708	0.852201	0.113885	0.70497	0.0151046	0.0130443	0.304918	0.0951645	0.13857	0.0973194	0.271221	0.0888281	0.520917	0.613502	0.338186	0.00956301	0.018053	0.0190844	0.00735235	0.480187	0.57252	0.0548623	0.0881927	0	1.4908	0.0309045	0.00279414	0.0251906	0	0.00783191	0.00809389	0.00422743	0.00320337	0.00299886	0.00344804	0.00344804	0.00344804	0.00344804	0.00344804	0.038274	0.0482667
			Air pollutant control equipment	0.389394	0.15628	0.171338	0.212471	0.0216587	0.293708	0.852201	0.113885	0.70497	0.0151046	0.0130443	0.304918	0.0951645	0.13857	0.0973194	0.271221	0.0888281	0.520917	0.613502	0.338186	0.00956301	0.018053	0.0190844	0.00735235	0.480187	0.57252	0.0548623	0.0881927	0	1.4908	0.0309045	0.00279414	0.0251906	0	0.00783191	0.00809389	0.00422743	0.00320337	0.00299886	0.00344804	0.00344804	0.00344804	0.00344804	0.00344804	0.038274	0.0482667
			Packaging equipment	0.389394	0.15628	0.171338	0.212471	0.0216587	0.293708	0.852201	0.113885	0.70497	0.0151046	0.0130443	0.304918	0.0951645	0.13857	0.0973194	0.271221	0.0888281	0.520917	0.613502	0.338186	0.00956301	0.018053	0.0190844	0.00735235	0.480187	0.57252	0.0548623	0.0881927	0	1.4908	0.0309045	0.00279414	0.0251906	0	0.00783191	0.00809389	0.00422743	0.00320337	0.00299886	0.00344804	0.00344804	0.00344804	0.00344804	0.00344804	0.038274	0.0482667
			Metal smelting equipment	0.389394	0.15628	0.171338	0.212471	0.0216587	0.293708	0.852201	0.113885	0.70497	0.0151046	0.0130443	0.304918	0.0951645	0.13857	0.0973194	0.271221	0.0888281	0.520917	0.613502	0.338186	0.00956301	0.018053	0.0190844	0.00735235	0.480187	0.57252	0.0548623	0.0881927	0	1.4908	0.0309045	0.00279414	0.0251906	0	0.00783191	0.00809389	0.00422743	0.00320337	0.00299886	0.00344804	0.00344804	0.00344804	0.00344804	0.00344804	0.038274	0.0482667
			Metal-cutting machine tool	0.389394	0.15628	0.171338	0.212471	0.0216587	0.293708	0.852201	0.113885	0.70497	0.0151046	0.0130443	0.304918	0.0951645	0.13857	0.0973194	0.271221	0.0888281	0.520917	0.613502	0.338186	0.00956301	0.018053	0.0190844	0.00735235	0.480187	0.57252	0.0548623	0.0881927	0	1.4908	0.0309045	0.00279414	0.0251906	0	0.00783191	0.00809389	0.00422743	0.00320337	0.00299886	0.00344804	0.00344804	0.00344804	0.00344804	0.00344804	0.038274	0.0482667
		Electronics coating	Circuit board	0.389394	0.15628	0.171338	0.212471	0.0216587	0.293708	0.852201	0.113885	0.70497	0.0151046	0.0130443	0.304918	0.0951645	0.13857	0.0973194	0.271221	0.0888281	0.520917	0.613502	0.338186	0.00956301	0.018053	0.0190844	0.00735235	0.480187	0.57252	0.0548623	0.0881927	0	1.4908	0.0309045	0.00279414	0.0251906	0	0.00783191	0.00809389	0.00422743	0.00320337	0.00299886	0.00344804	0.00344804	0.00344804	0.00344804	0.00344804	0.038274	0.0482667
			Mobile phone	0.389394	0.15628	0.171338	0.212471	0.0216587	0.293708	0.852201	0.113885	0.70497	0.0151046	0.0130443	0.304918	0.0951645	0.13857	0.0973194	0.271221	0.0888281	0.520917	0.613502	0.338186	0.00956301	0.018053	0.0190844	0.00735235	0.480187	0.57252	0.0548623	0.0881927	0	1.4908	0.0309045	0.00279414	0.0251906	0	0.00783191	0.00809389	0.00422743	0.00320337	0.00299886	0.00344804	0.00344804	0.00344804	0.00344804	0.00344804	0.038274	0.0482667
			Color television receiver	0.389394	0.15628	0.171338	0.212471	0.0216587	0.293708	0.852201	0.113885	0.70497	0.0151046	0.0130443	0.304918	0.0951645	0.13857	0.0973194	0.271221	0.0888281	0.520917	0.613502	0.338186	0.00956301	0.018053	0.0190844	0.00735235	0.480187	0.57252	0.0548623	0.0881927	0	1.4908	0.0309045	0.00279414	0.0251906	0	0.00783191	0.00809389	0.00422743	0.00320337	0.00299886	0.00344804	0.00344804	0.00344804	0.00344804	0.00344804	0.038274	0.0482667
			Microcomputer	0.389394	0.15628	0.171338	0.212471	0.0216587	0.293708	0.852201	0.113885	0.70497	0.0151046	0.0130443	0.304918	0.0951645	0.13857	0.0973194	0.271221	0.0888281	0.520917	0.613502	0.338186	0.00956301	0.018053	0.0190844	0.00735235	0.480187	0.57252	0.0548623	0.0881927	0	1.4908	0.0309045	0.00279414	0.0251906	0	0.00783191	0.00809389	0.00422743	0.00320337	0.00299886	0.00344804	0.00344804	0.00344804	0.00344804	0.00344804	0.038274	0.0482667
			Air conditioner	0.389394	0.15628	0.171338	0.212471	0.0216587	0.293708	0.852201	0.113885	0.70497	0.0151046	0.0130443	0.304918	0.0951645	0.13857	0.0973194	0.271221	0.0888281	0.520917	0.613502	0.338186	0.00956301	0.018053	0.0190844	0.00735235	0.480187	0.57252	0.0548623	0.0881927	0	1.4908	0.0309045	0.00279414	0.0251906	0	0.00783191	0.00809389	0.00422743	0.00320337	0.00299886	0.00344804	0.00344804	0.00344804	0.00344804	0.00344804	0.038274	0.0482667
		Vehicle repair		0	1.9	1.53	0.02	0	0	0	0	0	0	0	0.05	0	0.2	0	0	0	0	0	1.66	0	0	0	0	0	0	0	0	0	0	0	0	0	0	0	0	0	0	0	0	0	0	0	0	0	0
	Bituminous Pavement Road			0	3.20961	0.652193	2.58438	0.252918	0.685573	1.73704	0	4.45751	0.218254	0.224673	1.19141	0.690709	1.32493	1.29283	0.345354	0.143791	0.437791	0	3.05684	0	0	0	0	1.22479	5.15721	10.5802	9.23085	22.1014	0	1.53548	0.259337	1.23763	0	0.270891	0.0924369	0	0.462184	0.716386	0	0	0	0	0	0	0
VOC-product utilization	Residents living consumption	Cooking	Catering services	0.994598	4.12989	0.0480703	0.0858399	0	0.0320469	0.0915625	0	0	0	0	0	0	0.0114453	0	0	0	0	0	0.0125898	0	0	0	0	0.0125898	0.056082	0.0743945	0	0	0.0869844	0	0	0	0.0858399	0	0	0	0	0	0	0	0	0	0	0	0.0629492
			Home cooking	0.994598	4.12989	0.0480703	0.0858399	0	0.0320469	0.0915625	0	0	0	0	0	0	0.0114453	0	0	0	0	0	0.0125898	0	0	0	0	0.0125898	0.056082	0.0743945	0	0	0.0869844	0	0	0	0.0858399	0	0	0	0	0	0	0	0	0	0	0	0.0629492
		Commercial/Consumer Solvent Use	Aerosol products	0	2.63661	9.21807	1.79129	0	0	0	0	0	0	0	0	0	0	0	0	0	0	0	0	0	0	0	0	0	0	0	0	0	0	0	0	0	0	0	0	0	0	0	0	0	0	0	0	0	0
			Household products	0	2.63661	9.21807	1.79129	0	0	0	0	0	0	0	0	0	0	0	0	0	0	0	0	0	0	0	0	0	0	0	0	0	0	0	0	0	0	0	0	0	0	0	0	0	0	0	0	0	0
			Makeup	0	2.63661	9.21807	1.79129	0	0	0	0	0	0	0	0	0	0	0	0	0	0	0	0	0	0	0	0	0	0	0	0	0	0	0	0	0	0	0	0	0	0	0	0	0	0	0	0	0	0
			Nonindustrial adhesives	0	0	2.49075	0	0	0	0	0	0	0	0	0	0	0	0	0	0	0	0	0	0	0	0	0	0	0	0	0	0	0	0	0	0	0	0	0	0	0	0	0	0	0	0	0	0	0
			Space deodorant	1.22197	1.51266	0.497725	1.60581	0.153709	1.04774	0.985518	0.103309	0.241298	0.14698	0.0795931	1.03231	0.743414	0.845477	0.438699	0.120531	0.033941	0.535996	0.299926	0.871688	0.0596462	0.119761	0.252022	0.275974	0.652436	0.571943	0.60055	0.546398	0.63872	1.45045	1.91589	0.100809	0.417064	0.383643	0.242799	0.202124	0.0768565	0.154471	0.226582	0.148713	0	0	0	0	0.183074	0
			Insect repellents	0	0	0	0	0	0	0	0	23.4396	0	0	0	0	65.9216	0	0	0	0	0	0	0	0	0	0	0	0	0	0	0	0	0	1.46559	0	0	0	0	0	0	0	0	0	0	0	0	0	0
			Laundry detergent and dry cleaning	0	0	0	0	0	0	0	0	0	0	0	0	0	0	0	0	0	0	0	0	0	0	0	0	0	0	0	0	0	0	0	0	0	0	0	0	0	0	0	0	0	0	0	0	0	0
	Other prooducts utilization	Printing	Offset printing ink (thermosetting/cold setting wheel)	0	0.449486	0.517184	0.678423	0.0469241	0.959422	0.153579	0.415318	0.130181	0.00180489	0.0652783	0.358996	0.41584	1.84092	0.859121	0.0519455	0.0174907	0.432242	0.682934	0.925666	0.00437267	0.0490489	1.20853	0.568377	2.15072	3.33586	2.94425	2.13009	0.358841	0	0.0804465	0	0.0907085	0	0.029494	0.0356638	0.04287	0.0165751	0.0225962	0.000642254	0	0	0	0	0	0
			Flexo printing ink (solvent-based/water-based)	0	0.449486	0.517184	0.678423	0.0469241	0.959422	0.153579	0.415318	0.130181	0.00180489	0.0652783	0.358996	0.41584	1.84092	0.859121	0.0519455	0.0174907	0.432242	0.682934	0.925666	0.00437267	0.0490489	1.20853	0.568377	2.15072	3.33586	2.94425	2.13009	0.358841	0	0.0804465	0	0.0907085	0	0.029494	0.0356638	0.04287	0.0165751	0.0225962	0.000642254	0	0	0	0	0	0
			Gravure printing ink (solvent-based/water-based)	0	0.449486	0.517184	0.678423	0.0469241	0.959422	0.153579	0.415318	0.130181	0.00180489	0.0652783	0.358996	0.41584	1.84092	0.859121	0.0519455	0.0174907	0.432242	0.682934	0.925666	0.00437267	0.0490489	1.20853	0.568377	2.15072	3.33586	2.94425	2.13009	0.358841	0	0.0804465	0	0.0907085	0	0.029494	0.0356638	0.04287	0.0165751	0.0225962	0.000642254	0	0	0	0	0	0
			Letterpress printing ink	0	0.449486	0.517184	0.678423	0.0469241	0.959422	0.153579	0.415318	0.130181	0.00180489	0.0652783	0.358996	0.41584	1.84092	0.859121	0.0519455	0.0174907	0.432242	0.682934	0.925666	0.00437267	0.0490489	1.20853	0.568377	2.15072	3.33586	2.94425	2.13009	0.358841	0	0.0804465	0	0.0907085	0	0.029494	0.0356638	0.04287	0.0165751	0.0225962	0.000642254	0	0	0	0	0	0
		Pesticide utilization		0	0	0	0	0	0	0	0	23.4396	0	0	0	0	65.9216	0	0	0	0	0	0	0	0	0	0	0	0	0	0	0	0	0	1.46559	0	0	0	0	0	0	0	0	0	0	0	0	0	0
Biomass burning	Field burning	Crop residue	Wheat	3.2469	3.13176	0.301644	0.609079	0.0208728	0.230888	2.08966	0.0658843	0.0696705	0.0108814	1.65043	1.70551	0.240456	0.283523	0.07103	0.000350229	0.0401885	0.0723724	0.906422	0.271023	0.0375538	0.00269253	0.0603818	0.167619	0.141099	0.0960226	0.0613535	0.00283075	0.013888	7.63891	5.10144	0.233034	1.63544	0.609516	0.467883	0.649443	1.34759	0.380485	0.251611	0.293243	0	0	0	0	0.129857	2.42665
			Rice	3.2469	3.13176	0.301644	0.609079	0.0208728	0.230888	2.08966	0.0658843	0.0696705	0.0108814	1.65043	1.70551	0.240456	0.283523	0.07103	0.000350229	0.0401885	0.0723724	0.906422	0.271023	0.0375538	0.00269253	0.0603818	0.167619	0.141099	0.0960226	0.0613535	0.00283075	0.013888	7.63891	5.10144	0.233034	1.63544	0.609516	0.467883	0.649443	1.34759	0.380485	0.251611	0.293243	0	0	0	0	0.129857	2.42665
			Maize	3.2469	3.13176	0.301644	0.609079	0.0208728	0.230888	2.08966	0.0658843	0.0696705	0.0108814	1.65043	1.70551	0.240456	0.283523	0.07103	0.000350229	0.0401885	0.0723724	0.906422	0.271023	0.0375538	0.00269253	0.0603818	0.167619	0.141099	0.0960226	0.0613535	0.00283075	0.013888	7.63891	5.10144	0.233034	1.63544	0.609516	0.467883	0.649443	1.34759	0.380485	0.251611	0.293243	0	0	0	0	0.129857	2.42665
			Others	3.2469	3.13176	0.301644	0.609079	0.0208728	0.230888	2.08966	0.0658843	0.0696705	0.0108814	1.65043	1.70551	0.240456	0.283523	0.07103	0.000350229	0.0401885	0.0723724	0.906422	0.271023	0.0375538	0.00269253	0.0603818	0.167619	0.141099	0.0960226	0.0613535	0.00283075	0.013888	7.63891	5.10144	0.233034	1.63544	0.609516	0.467883	0.649443	1.34759	0.380485	0.251611	0.293243	0	0	0	0	0.129857	2.42665
	Biofuel	Crop residue		5.0958	1.24427	0.436354	0.359295	0.00089894	0.00301904	0.0786744	0.00118558	0.000100257	0.0181431	0.000301516	0.000920676	0.000259281	0.253236	0.000192522	0.000258235	0	0.000211384	0.0249269	0.194172	0.000193476	6.98625e-05	0.000586641	0.00100157	0.024834	0.0441474	0.0238283	0.023392	0.0571685	18.5619	3.65944	0.98192	1.74676	0.0636844	0.283753	0.425663	0.505297	0.242645	0.0698577	0.145756	0	0	0	0	0.0996171	9.91385
		Firewood		2.41651	0.775431	0.354421	0.367169	0.00429601	0	0.253733	0	0	0	0	0	0.00429601	0.186328	0	0.00214801	0	0	0.0708316	0.781952	0	0	0	0	0.0661095	0	0.00859203	0.01074	0.0762104	6.03375	1.86447	0.758728	1.77016	0	0.221849	0.497275	0.325878	0.170492	0.0386641	0.331878	0	0	0	0	0.186523	3.45829
		Biogas		43.2341	27.6013	5.89858	10.9173	0.1093	2.00217	2.5177	0	0.0322977	0	0	0	0	3.89721	0.0522299	0	0	0	0	0	0	0	0	0	0	0	0	0	0	0	0	0	0	0	0	0	0	0	0	0	0	0	0	0	0	0
		Wu R , Xie S . Spatial Distribution of Ozone Formation in China Derived from Emissions of Speciated Volatile Organic Compounds[J]. Environmental Science & Technology, 2017, 51(5):2574-2583.
[truncated: 107 more columns]

## Sheet: Table S9
Table S8. Provincial scattered coal consumption of different civil terminal in 2016 (104 ton, sort from large to small).
No.	Province	Rural Residential	Urban Residential	Rural Production	Commercial and Public	Total
1	Hebei	3551	335.4	130.6	97.7	4114.6
2	Shandong	2184.1	236.3	90.8	420.1	2931.3
3	Heilongjiang	1186.9	228.7	402	986.4	2804
4	Neimenggu	1429.8	47.6	491.7	633.1	2602.3
5	Shanxi	1767.3	309.3	205.4	180.1	2462.1
6	Guizhou	658.3	121.3	195.5	1190	2165.1
7	Hunan	825.9	143.2	489	466.4	1924.4
8	Xinjiang	872.6	80.6	204.8	65	1223
9	Hubei	561.6	125.9	205.2	239.3	1132
10	Liaoning	719.1	263.6	22	67.7	1072.4
11	Henan	825	144.6	72	3.2	1044.8
12	Jiangxi	951	33.5	20	24	1028.5
13	Shannxi	790.9	75.8	21.3	74.9	962.8
14	Jilin	453.1	100	85.5	199.5	838
15	Gansu	649	71	57.5	29	806.5
16	Yunnan	366.1	22.6	218	123.8	730.4
17	Beijing	320	91.7	24.2	21.9	457.8
18	Anhui	288.8	33.2	61.1	50.9	434
19	Guangdong	252.9	35.6	62.7	46.3	397.5
20	Zhejiang	223.2	18.5	6.5	73.8	322
21	Chongqing	234.9	1.6	60.1	15.3	312
22	Jiangsu	229.1	0	49	0	278.1
23	Sichuan	238.5	0	8.2	28.3	275
24	Tianjin	142	5.1	20.1	11.6	178.8
25	Qinghai	148.6	10.9	2.7	8.2	170.4
26	Guangxi	141.6	4.1	8	3	156.6
27	Ningxia	143.4	1.9	4.8	4.3	154.3
28	Fujian	32.5	6.8	40.5	4	83.8
29	Shanghai	4.4	14.8	1	17.4	37.6
30	Hainan	36.9	0	0	0	36.9
	Total	20228.5	2563.4	3260	5085	31136.9

## Sheet: Table S10
Table S9. Provincial scattered coal consumption of different civil terminal in 2017 (104 ton, sort from large to small).
No.	Province	Rural Residential	Urban Residential	Rural Production	Commercial and Public	Total
1	Hebei	2737	292	95.3	101.7	3226.1
2	Heilongjiang	1240.9	266	453.3	881.3	2841.5
3	Shandong	2082.1	208.9	60.2	341.5	2692.8
4	Neimenggu	1436.5	46.8	676	382.3	2541.6
5	Shanxi	1567.2	363.4	173.6	190.1	2294.3
6	Guizhou	627.6	130	195.6	1210.9	2164.1
7	Hunan	805.1	162.9	493.9	487.1	1949
8	Xinjiang	915.9	72.6	205	62	1255.5
9	Hubei	563.4	125.2	203.7	265.4	1157.6
10	Liaoning	739.3	279.6	22	45.8	1086.7
11	Jiangxi	947.1	34.5	21	25	1027.6
12	Shannxi	804.4	59.1	19.8	66.8	950
13	Henan	708.5	102.7	42	59.6	912.8
14	Gansu	651.7	60	58	28	797.7
15	Jilin	475.3	14.7	85.5	159.3	734.8
16	Yunnan	338.2	19.3	218.5	112.2	688.2
17	Anhui	295	22.9	56.7	54	428.6
18	Guangdong	255.5	36.4	61.2	48	401
19	Chongqing	225.3	1.4	58.4	14.9	300
20	Zhejiang	224	13.9	7	46	290.9
21	Sichuan	237.7	0	11.6	35.1	284.4
22	Jiangsu	229	0	48.5	0	277.5
23	Beijing	162.9	60.8	13	8.9	245.6
24	Qinghai	145.5	32.2	3.2	9.6	190.4
25	Guangxi	141.4	4.3	8	2.5	156.2
26	Ningxia	142.2	2.9	5	4.2	154.2
27	Tianjin	71	2.4	20.1	4.3	97.9
28	Fujian	31.9	5.5	34.1	3.8	75.3
29	Hainan	38.3	0	0	0	38.3
30	Shanghai	2	2	0.3	2	6.3
	Total	18841.9	2422.2	3350.4	4652.3	29266.8
